# Supplementary material for: Women’s Involvement in Steady Exercise (WISE): Study Protocol for a Randomized Controlled Trial
Source: MDPI journal article supplement (doi:10.3390/healthcare11091279), 2023-04-29
Supplement: s1 [file s1]

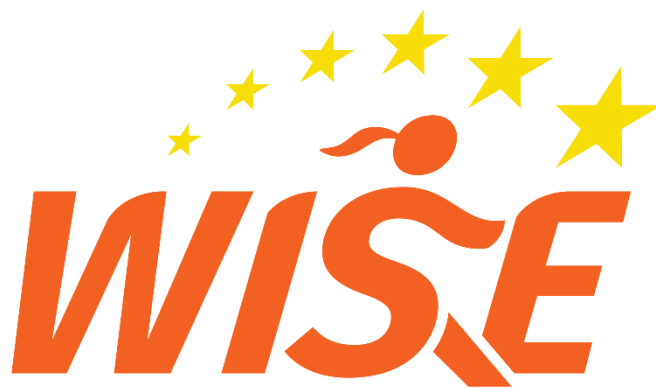

WOMEN'S INVOLVEMENT IN STEADY EXERCISE

# WISE EXERCISE PROTOCOL

Women's Involvement In Steady Exercise

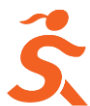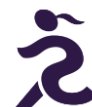

# Index

---

|                              |    |
|------------------------------|----|
| Index.....                   | 1  |
| HIIT training protocol ..... | 4  |
| Month 1.....                 | 5  |
| Common Part .....            | 5  |
| Dynamic Warm-up .....        | 5  |
| Stretching .....             | 9  |
| Main part.....               | 11 |
| Week 1 - Session 1 .....     | 11 |
| Week 1 - Session 2 .....     | 13 |
| Week 2 - Session 1 .....     | 14 |
| Week 2 - Session 2 .....     | 15 |
| Week 3 - Session 1 .....     | 16 |
| Week 3 - Session 2 .....     | 17 |
| Week 4 - Session 1 .....     | 19 |
| Week 4 - Session 2 .....     | 20 |
| Month 2.....                 | 21 |
| Common Part .....            | 21 |
| Dynamic Warm-up .....        | 21 |
| Stretching .....             | 24 |
| Main part.....               | 25 |
| Week 1 - Session 1 .....     | 25 |
| Week 1 - Session 2 .....     | 26 |
| Week 2 - Session 1 .....     | 27 |
| Week 2 - Session 2 .....     | 28 |
| Week 3 - Session 1 .....     | 29 |
| Week 3 - Session 2 .....     | 31 |
| Week 4 - Session 1 .....     | 33 |
| Week 4 - Session 2 .....     | 34 |
| Month 3.....                 | 36 |
| Common Part .....            | 36 |

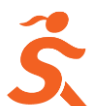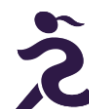

|                          |    |
|--------------------------|----|
| Dynamic Warm-up .....    | 36 |
| Stretchin .....          | 38 |
| Main part.....           | 40 |
| Week 1 - Session 1 ..... | 40 |
| Week 1 - Session 2 ..... | 41 |
| Week 2 - Session 1 ..... | 43 |
| Week 2 - Session 2 ..... | 45 |
| Week 3 - Session 1 ..... | 46 |
| Week 3 - Session 2 ..... | 47 |
| Week 4 - Session 1 ..... | 48 |
| Week 4 - Session 2 ..... | 49 |
| Month 4.....             | 50 |
| Common Part .....        | 50 |
| Dynamic Warm-up .....    | 50 |
| Stretching .....         | 52 |
| Main part.....           | 53 |
| Week 1 - Session 1 ..... | 53 |
| Week 1 - Session 2 ..... | 55 |
| Week 2 - Session 1 ..... | 56 |
| Week 2 - Session 2 ..... | 58 |
| Week 3 - Session 1 ..... | 60 |
| Week 3 - Session 2 ..... | 62 |
| Week 4 - Session 1 ..... | 63 |
| Week 4 - Session 2 ..... | 64 |
| Month 5.....             | 66 |
| Common Part .....        | 66 |
| Dynamic Warm-up .....    | 66 |
| Stretching .....         | 68 |
| Main part.....           | 70 |
| Week 1 - Session 1 ..... | 70 |
| Week 1 - Session 2 ..... | 71 |
| Week 2 - Session 1 ..... | 72 |
| Week 2 - Session 2 ..... | 73 |
| Week 3 - Session 1 ..... | 74 |

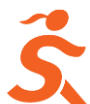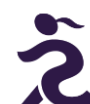

|                          |     |
|--------------------------|-----|
| Week 3 - Session 2 ..... | 75  |
| Week 4 - Session 1 ..... | 78  |
| Week 4 - Session 2 ..... | 79  |
| Month 6.....             | 82  |
| Common Part .....        | 82  |
| Dynamic Warm-u .....     | 82  |
| Stretching .....         | 84  |
| Main part.....           | 85  |
| Week 1 - Session 1 ..... | 85  |
| Week 1 - Session 2 ..... | 88  |
| Week 2 - Session 1 ..... | 90  |
| Week 2 - Session 2 ..... | 93  |
| Week 3 - Session 1 ..... | 96  |
| Week 3 - Session 2 ..... | 98  |
| Week 4 - Session 1 ..... | 101 |
| Week 4 - Session 2 ..... | 102 |
| Week 5 - Session 1 ..... | 105 |
| Week 5 - Session 2 ..... | 107 |



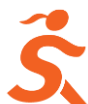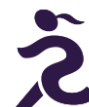

# HIIT training protocol

---

- **Duration of the protocol:** 6 months
- **Trainings days:** twice a week, Monday and Wednesday
- **Video duration** about 20 minutes, warm up 5 minutes, cool down 5 minutes, HIIT protocol 10-15 minutes.
- **Time sets:** 20'' exercise - 20'' rest (1st month), 20'' exercise - 15'' rest (2nd month), 20'' exercise - 10'' rest (3rd month), 30'' exercise - 20'' rest (4th month), 40'' exercise - 15'' rest (5<sup>th</sup> and 6th month)
- Exercises are different every day, and the intensity of the exercises is increased between sessions in the same week. Exercise load, warm-up and stretching are changed every 4 weeks

| HIIT      | Time sets | Nº Exercises | Duration | Sets | Rest between sets |
|-----------|-----------|--------------|----------|------|-------------------|
| 1st month | 20/20     | 4            | 20 min.  | 4    | 1 min.            |
| 2nd month | 20/15     | 4            | 20 min.  | 4    | 1 min.            |
| 3rd month | 20/10     | 4            | 17 min.  | 4    | 1 min.            |
| 4th month | 30/20     | 4            | 20 min.  | 4    | 1 min.            |
| 5th month | 40/15     | 4            | 20 min.  | 4    | 1 min.            |
| 6th month | 40/15     | 4            | 20 min.  | 4    | 1 min.            |

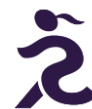

# Month 1 (20" of work - 20" of recovery)

## Common Part

*Dynamic Warm-up (At the beginning of each session before the main part) ([Link](#))*

| Exercise                                 | Photograph                                                                           |
|------------------------------------------|--------------------------------------------------------------------------------------|
| Neck flexion and extension               |   |
| Shoulder rotation with outstretched arms |  |

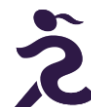

|                                   |  |  |
|-----------------------------------|--|--|
| <p>Hip rotation</p>               |  |  |
| <p>Knee flexion and extension</p> |  |  |
| <p>Ankle rotation</p>             |  |  |

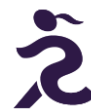

|                                               |                                                                                                                                                                                                                                                                                                                                                                                                                                                                                                                      |
|-----------------------------------------------|----------------------------------------------------------------------------------------------------------------------------------------------------------------------------------------------------------------------------------------------------------------------------------------------------------------------------------------------------------------------------------------------------------------------------------------------------------------------------------------------------------------------|
| <p>Taps: front,<br/>back, side,<br/>side.</p> |       |
| <p>Knees up</p>                               |                                                                                                                                                                                                                                                                                                                                               |



Heels up

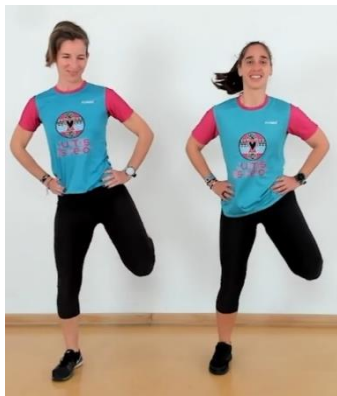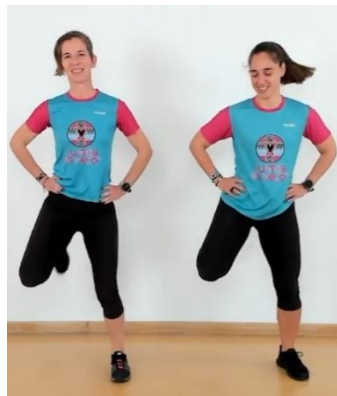



*Stretching (At the end of each session after the main part) ([Link](#))*

| Stretch                                          | Photograph                                                                           |
|--------------------------------------------------|--------------------------------------------------------------------------------------|
| Lateral and frontal neck lift                    | 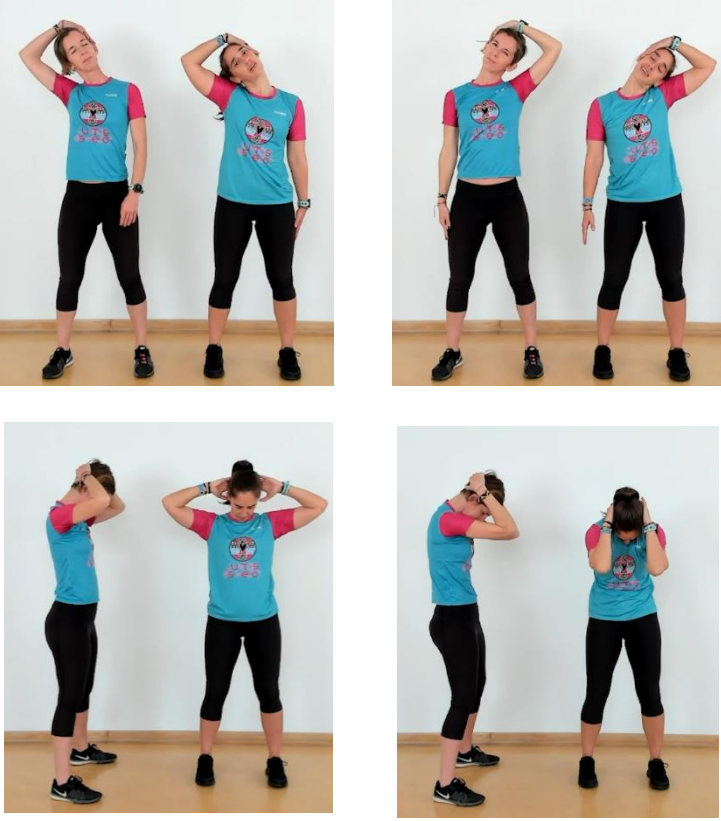  |
| Lateral tilt of spine with hands behind the neck |  |
| Forearm stretch                                  |  |



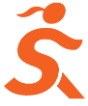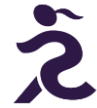

Flexion and extension of the spine

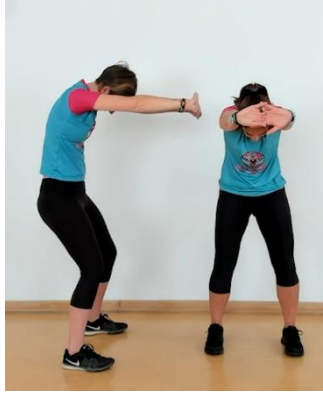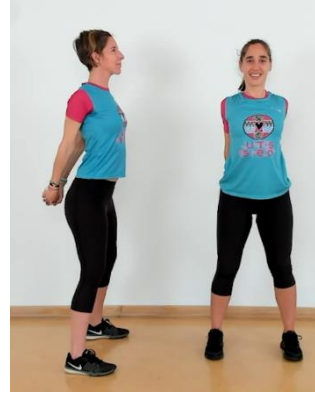

Stretching of biceps femoris going up in flexion of the spine

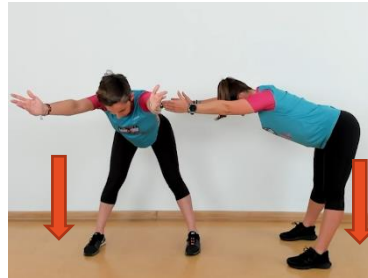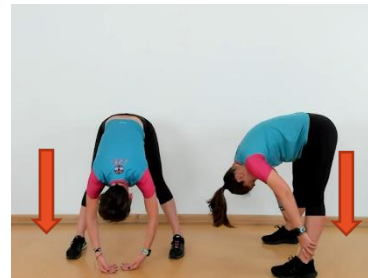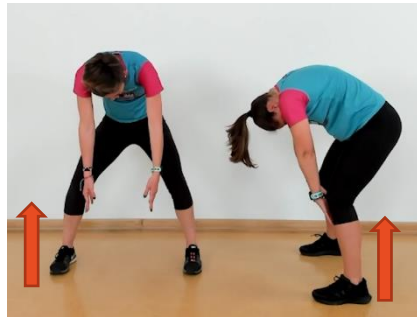

Abductor stretch

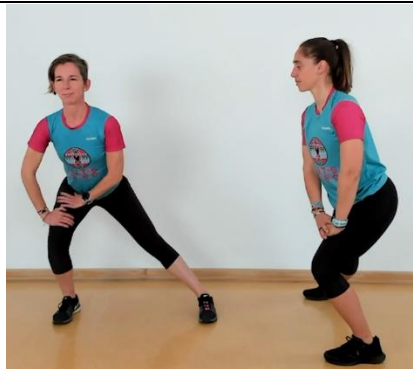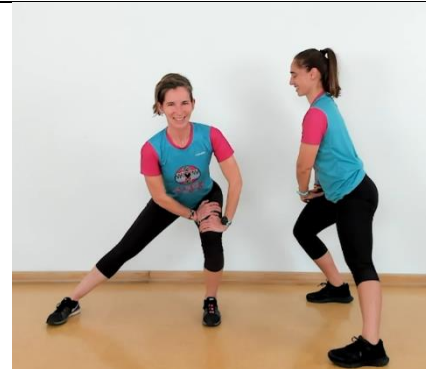

Stretching of biceps femoris and triceps sural.

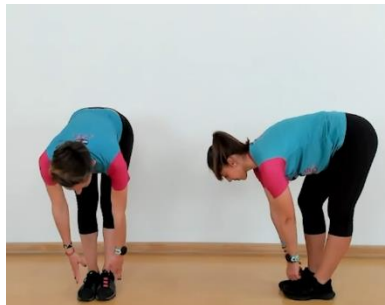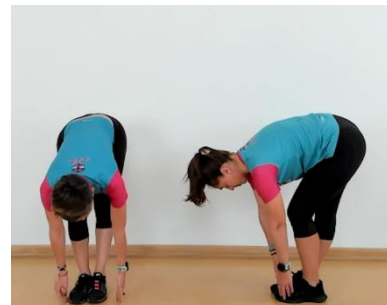



Main part (4 rounds of 4 exercises with 1' rest in between rounds) (20'' Work – 20'' Rest)

Week 1 - Session 1 ([Link](#))

| Exercise      | Photo                                                                                |
|---------------|--------------------------------------------------------------------------------------|
| Skipping      |    |
| Squat         |   |
| Press militar |  |





Lateral tilt (4 to one side 4 to the other)

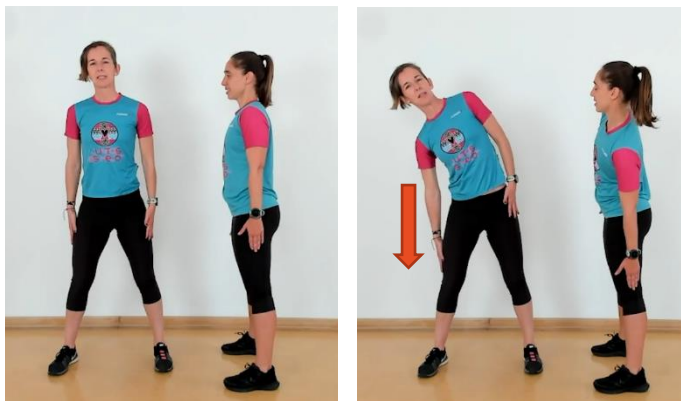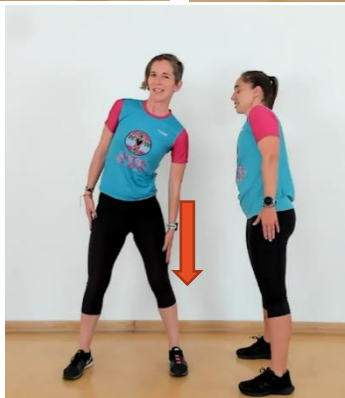



Week 1 - Session 2 ([Link](#))

| Exercise                                  | Photo |
|-------------------------------------------|-------|
| Skipping + arm extension                  |       |
| Squat + rise up on your toes              |       |
| Shoulder extension with outstretched arms |       |
| Double tilt                               |       |



Week 2 - Session 1 ([Link](#))

| Exercise         | Photo                                                                                |
|------------------|--------------------------------------------------------------------------------------|
| Tap side to side |    |
| Lunge            |   |
| Arms Rotation    |  |
| Side shrinks     |  |

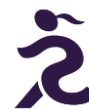

Week 2 - Session 2 ([Link](#))

| Exercise                              | Photo                                                                                |
|---------------------------------------|--------------------------------------------------------------------------------------|
| Dynamic tap side to side              |    |
| Double Lunge                          |   |
| Arms Rotation - Forward and backwards |  |
| Double side shrinks                   |  |



Week 3 - Session 1 ([Link](#))

| Exercise     | Photo                                                                                |
|--------------|--------------------------------------------------------------------------------------|
| Kicks        |    |
| Double Squat |   |
| Arms cross   |  |
| Leg twist    |  |



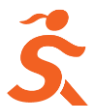

Week 3 - Session 2 ([Link](#))

| Exercise       | Photo                                                                                |
|----------------|--------------------------------------------------------------------------------------|
| Knee and kick  |   |
| 3 timed squats |  |

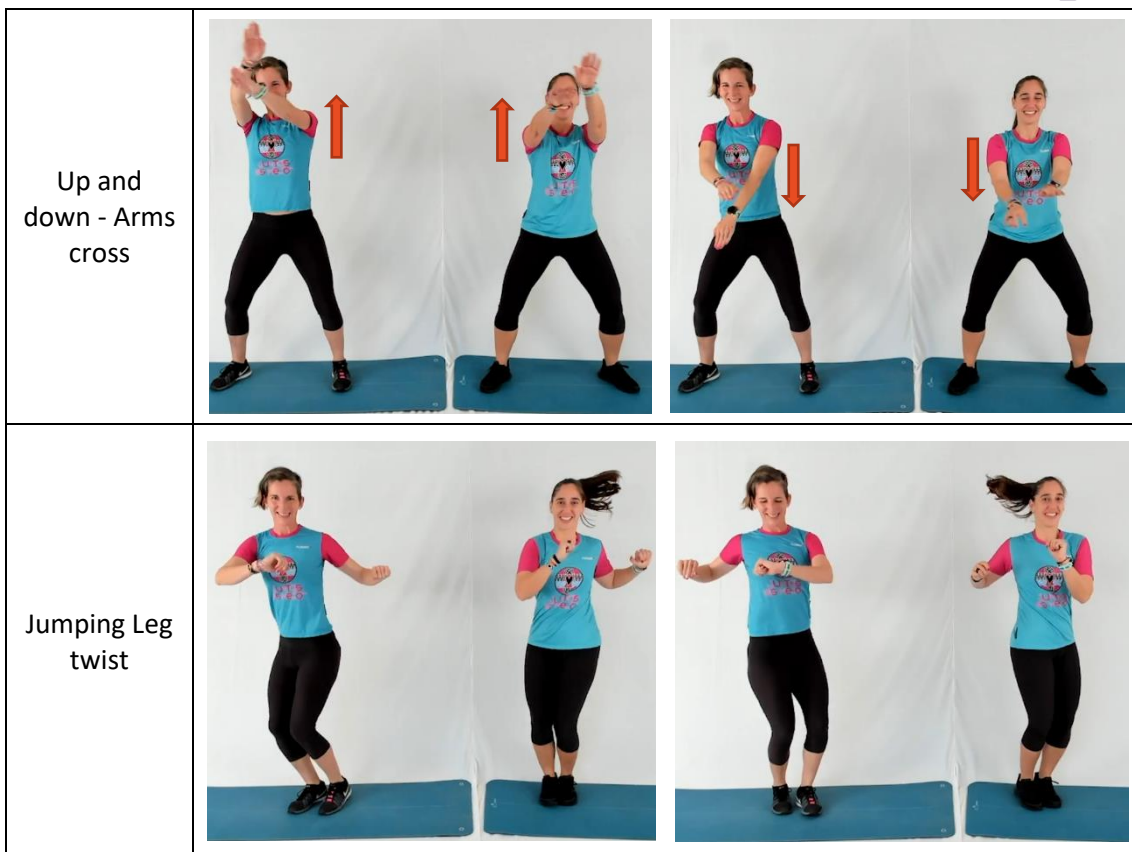



Week 4 - Session 1 ([Link](#))

| Exercise                   | Photo |
|----------------------------|-------|
| Skipping                   |       |
| Squat and heel tap forward |       |
| Punches                    |       |
| Side crunches              |       |





Week 4 - Session 2 ([Link](#))

| Exercise                                                 | Photo |
|----------------------------------------------------------|-------|
| In and out Skipping                                      |       |
| Squat forward and backward heel tap (once with each leg) |       |
| Double punches                                           |       |
| Double side crunches                                     |       |



## Month 2 (20" of work - 15" of recovery)

### Common Part

*Dynamic Warm-up (At the beginning of each session before the main part) ([Link](#))*

| Exercise                         | Photograph                                                                           |  |
|----------------------------------|--------------------------------------------------------------------------------------|--|
| Neck twisting                    |    |  |
| Neck flexion and extension       |   |  |
| Front and back shoulder rotation |  |  |
| Shoulder rotation                |  |  |



|                                                    |  |  |  |  |
|----------------------------------------------------|--|--|--|--|
| <p>Abduction and adduction of arms (ballistic)</p> |  |  |  |  |
| <p>Hip rotation</p>                                |  |  |  |  |
| <p>knee flexion and extension</p>                  |  |  |  |  |
| <p>Ankle rotation</p>                              |  |  |  |  |



|                                               |                                                                                      |
|-----------------------------------------------|--------------------------------------------------------------------------------------|
| <p>Taps: front,<br/>back, left,<br/>right</p> |    |
| <p>Knee lift</p>                              |   |
| <p>Back heels</p>                             |  |



Stretching (At the end of each session after the main part) ([Link](#))

| Stretch                                                                  | Photograph                                                                           |
|--------------------------------------------------------------------------|--------------------------------------------------------------------------------------|
| Stretching with bending + twisting                                       |    |
| Assisted shoulder stretch with crossed arm in front                      |    |
| Lateral spine tilt with arms extended                                    |   |
| Posterior chain stretch: Hip flexion + spinal rotation with extended arm |  |
| Cat Camel with hands on knee                                             |  |



Main part (4 rounds of 4 exercises with 1' rest in between rounds) (20'' Work – 15'' Rest)

Week 1 - Session 1 ([Link](#))

| Exercise                                        | Photo                                                                                |
|-------------------------------------------------|--------------------------------------------------------------------------------------|
| Taps                                            |    |
| Skater                                          |   |
| Shoulder back rotation with extended arm        |  |
| Lateral shrinkage of abdomen with arms in front |  |





Week 1 - Session 2 ([Link](#))

| Exercise                                         | Photo                                                                                |
|--------------------------------------------------|--------------------------------------------------------------------------------------|
| Scissor lunge                                    |    |
| Skater + abduction with extended leg             |   |
| Shoulder flexion and extension with extended arm |  |



|                                                |                                                                                    |
|------------------------------------------------|------------------------------------------------------------------------------------|
| <p>Lateral Abdominal Shrinkage + Knee Lift</p> |  |
|------------------------------------------------|------------------------------------------------------------------------------------|

*Week 2 - Session 1 ([Link](#))*

| Exercise                                 | Photo                                                                                |
|------------------------------------------|--------------------------------------------------------------------------------------|
| <p>Jumping</p>                           |  |
| <p>Lunge + Front knee lift with jump</p> |  |





|                               |                                                                                    |
|-------------------------------|------------------------------------------------------------------------------------|
| Arm opening<br>with 90° angle |  |
| Plank                         |  |

*Week 2 - Session 2 (Link)*

| Exercise                                  | Photo                                                                                |
|-------------------------------------------|--------------------------------------------------------------------------------------|
| JUMPING +3<br>Rebounds                    |  |
| Scissor + lunge<br>+ Frontal knee<br>lift |  |



|                                                  |                                                                                     |
|--------------------------------------------------|-------------------------------------------------------------------------------------|
|                                                  |   |
| Arm opening with 90° angle + front arm extension |   |
| Elbow Plank                                      |  |

*Week 3 - Session 1 ([Link](#))*

| Exercise                         | Photo                                                                                |
|----------------------------------|--------------------------------------------------------------------------------------|
| Frontal kick + Frontal knee lift |  |



|                                                          |                                                                                      |
|----------------------------------------------------------|--------------------------------------------------------------------------------------|
|                                                          |    |
| <p>Lunge in two times</p>                                |   |
| <p>Shoulder flexion and extension with extended arms</p> |  |
| <p>Lateral plank + up-down hip</p>                       |  |

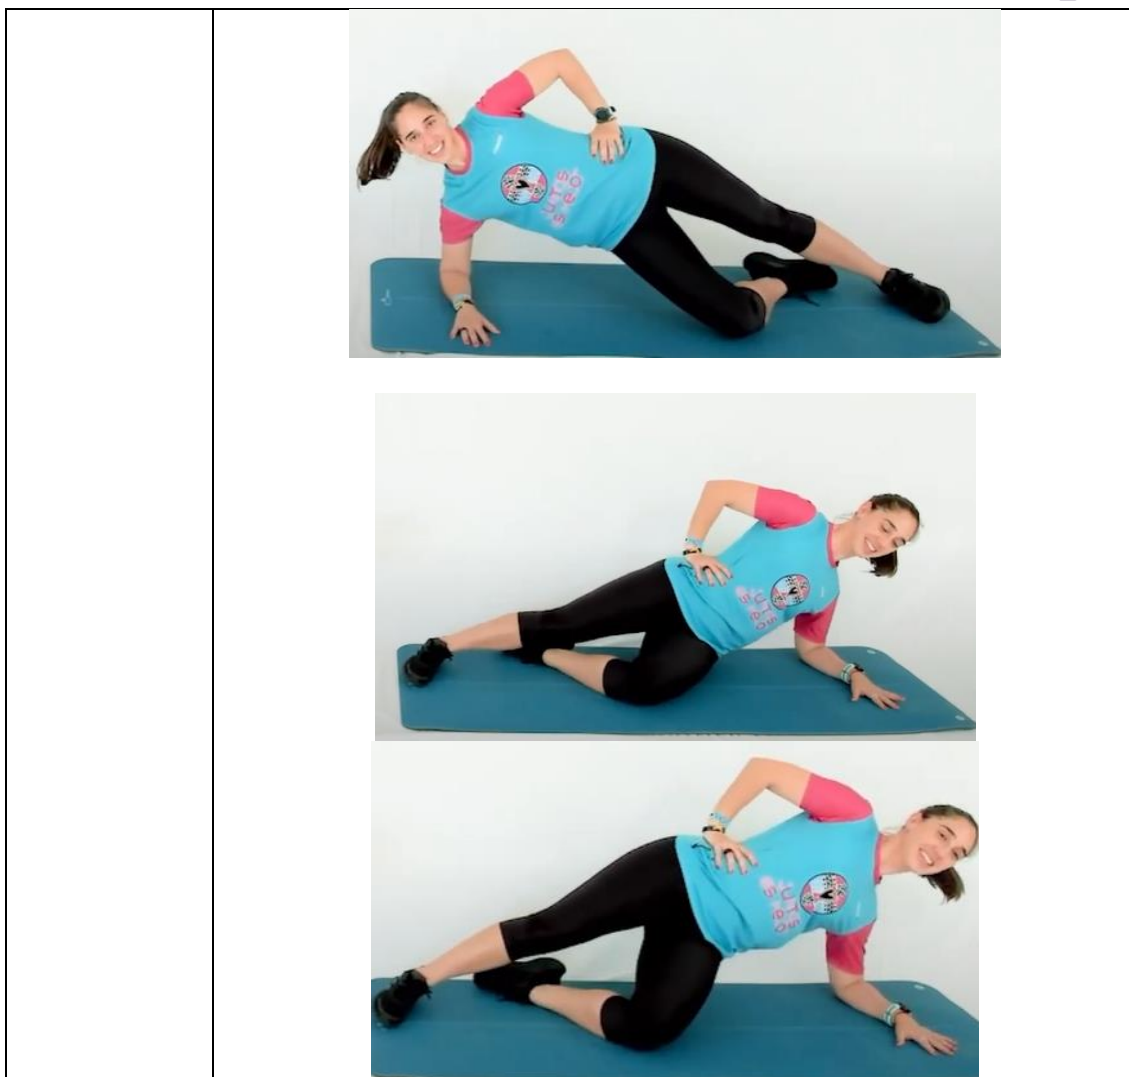

*Week 3 - Session 2 ([Link](#))*

| Exercise                       | Photo |
|--------------------------------|-------|
| Kick+ front knee lift + sprint |       |



|                                                                              |  |
|------------------------------------------------------------------------------|--|
|                                                                              |  |
| <p>Lunge 2 times<br/>go-2 times<br/>back</p>                                 |  |
| <p>Shoulder<br/>extension with<br/>extended arms<br/>+ elbow<br/>flexion</p> |  |
| <p>Isometric side<br/>plank</p>                                              |  |



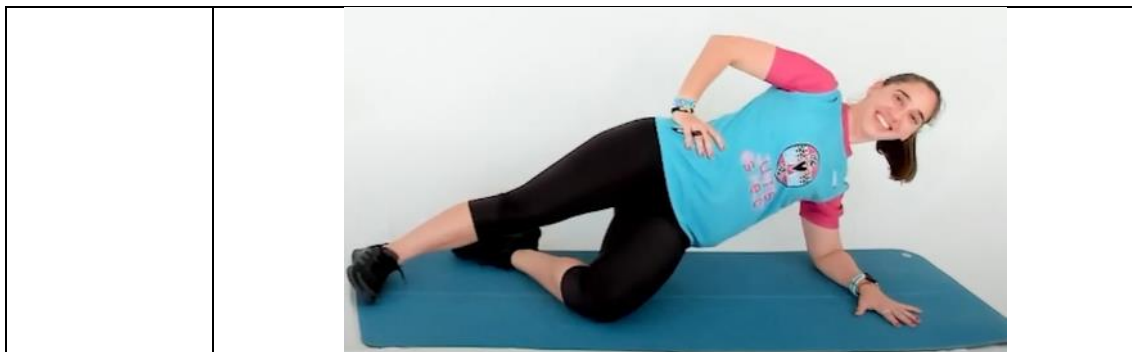

Week 4 - Session 1 ([Link](#))

| Exercise                          | Photo |
|-----------------------------------|-------|
| Lateral sprint                    |       |
| Sumo squat + Alternate heel lift  |       |
| Push up from four-footed position |       |

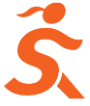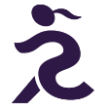

|                                   |                                                                                                                                                                           |
|-----------------------------------|---------------------------------------------------------------------------------------------------------------------------------------------------------------------------|
|                                   |                                                                                         |
| Plank +<br>Downward<br>facing dog | <br> |

*Week 4 - Session 2 ([Link](#))*

| Exercise                      | Photo                                                                                |
|-------------------------------|--------------------------------------------------------------------------------------|
| Lateral sprint<br>+ knee lift |  |



|                                                                             |                                                                                      |
|-----------------------------------------------------------------------------|--------------------------------------------------------------------------------------|
| <p>Sumo Squat+<br/>2 heel lifts</p>                                         | 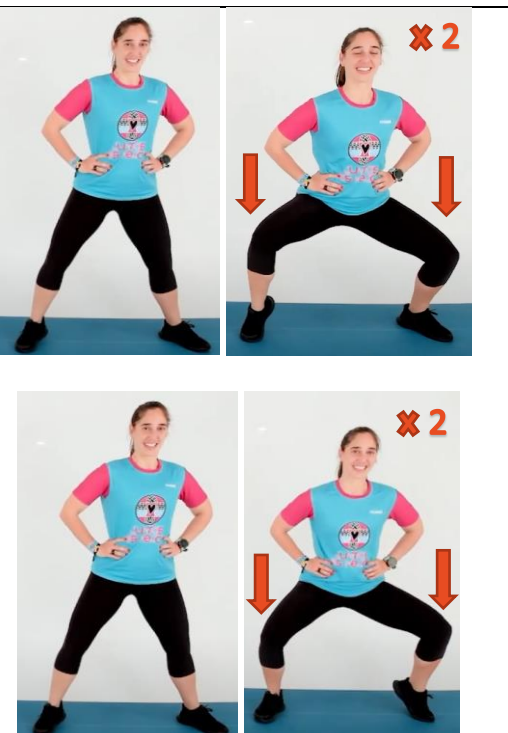   |
| <p>Push up with<br/>extended leg<br/>from four-<br/>footed<br/>position</p> |   |
| <p>Plank +<br/>Mountain<br/>climbing+<br/>Downward<br/>facing dog</p>       |  |



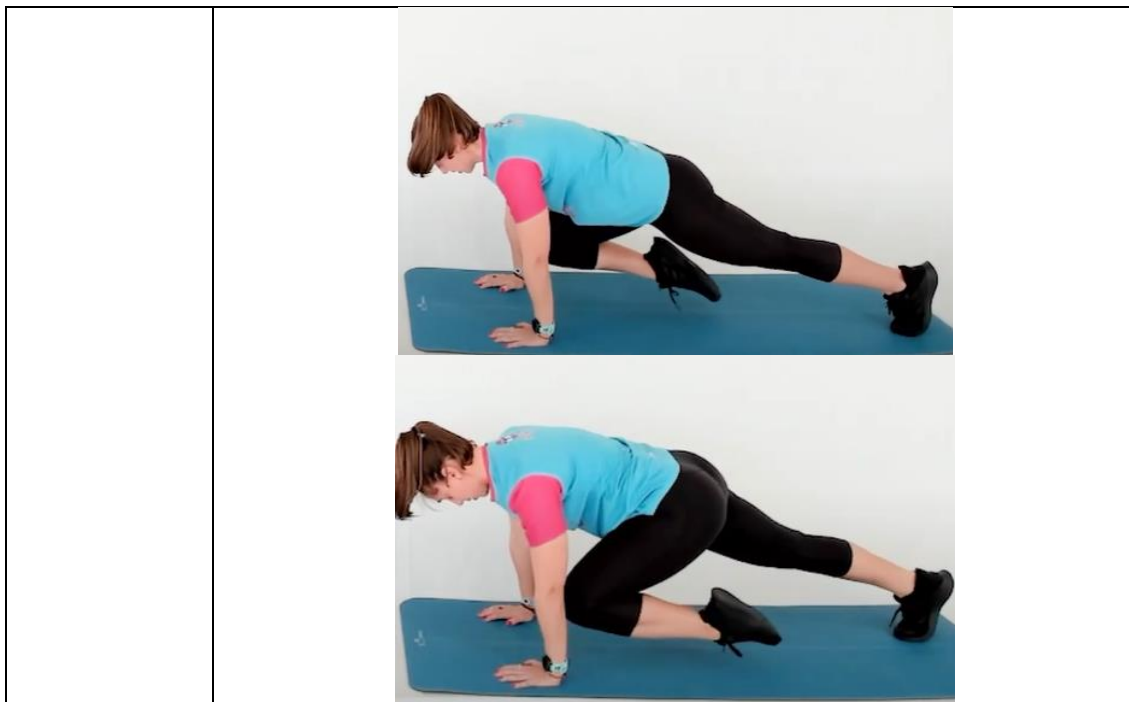

## Month 3 (20" of work - 10" of recovery)

### Common Part

*Dynamic Warm-up (At the beginning of each session before the main part) ([Link](#))*

| Exercise                                                                   | Photograph                                                                           |
|----------------------------------------------------------------------------|--------------------------------------------------------------------------------------|
| Hip and spine flexion + hip extension + spine lift from lumbar to cervical |  |

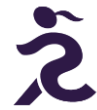

|                                                                            |                                                                                      |
|----------------------------------------------------------------------------|--------------------------------------------------------------------------------------|
| <p>Front-back<br/>shoulder<br/>rotation</p>                                |    |
| <p>Lateral swing<br/>with<br/>outstretched<br/>arms</p>                    |    |
| <p>Hip rotation</p>                                                        |   |
| <p>Abduction +<br/>hip adduction<br/>with extended<br/>leg (ballistic)</p> |  |



|                           |  |  |  |  |  |  |
|---------------------------|--|--|--|--|--|--|
| March opening and closing |  |  |  |  |  |  |
| Cross tap in front        |  |  |  |  |  |  |
| Cross tap behind          |  |  |  |  |  |  |

*Stretching (At the end of each session after the main part) ([Link](#))*

| Stretch | Photograph |  |
|---------|------------|--|
| Triceps |            |  |



|                                                      |  |  |
|------------------------------------------------------|--|--|
| <p>Cat camel<br/>from sitting<br/>position</p>       |  |  |
| <p>Spinal twisting<br/>with one leg<br/>extended</p> |  |  |
| <p>Lateral tilt<br/>with one leg<br/>extended</p>    |  |  |
| <p>Hip flexion<br/>with one leg<br/>extended</p>     |  |  |
| <p>Hip flexion<br/>with both legs<br/>extended</p>   |  |  |



Main part (4 rounds of 4 exercises with 1' rest in between rounds) (20'' Work – 10'' Rest)

Week 1 - Session 1 ([Link](#))

| Exercise                                    | Photo                                                                                |
|---------------------------------------------|--------------------------------------------------------------------------------------|
| Scissor + jump                              |    |
| Sumo squat                                  |   |
| Military press crossing arms above the head |  |
| Walking with your hands + plank             |  |

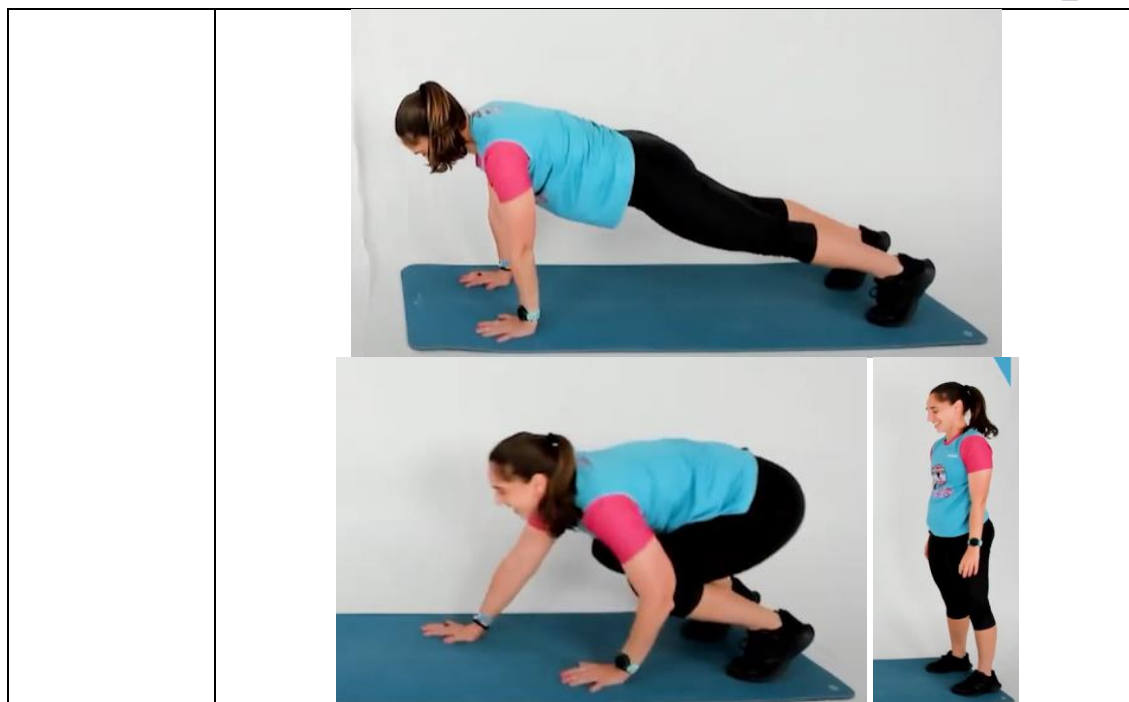

*Week 1 - Session 2 (Link)*

| Exercise                   | Photo |
|----------------------------|-------|
| Scissor + lateral arm lift |       |
| Sumo squat + jump          |       |



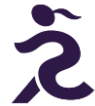

Press militar +  
Double arms  
crossing

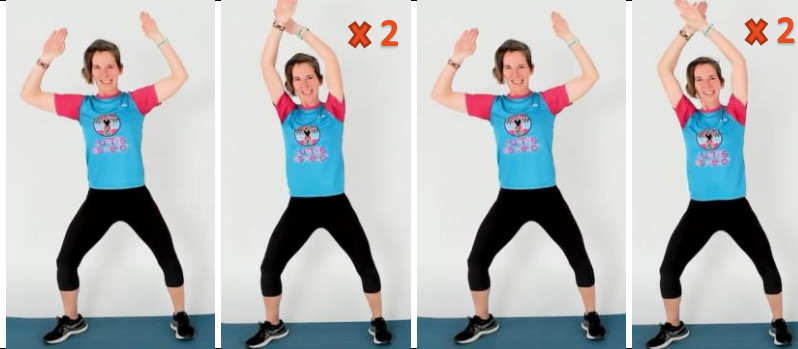

Walking with  
your hands +  
plank +  
mountain  
climber

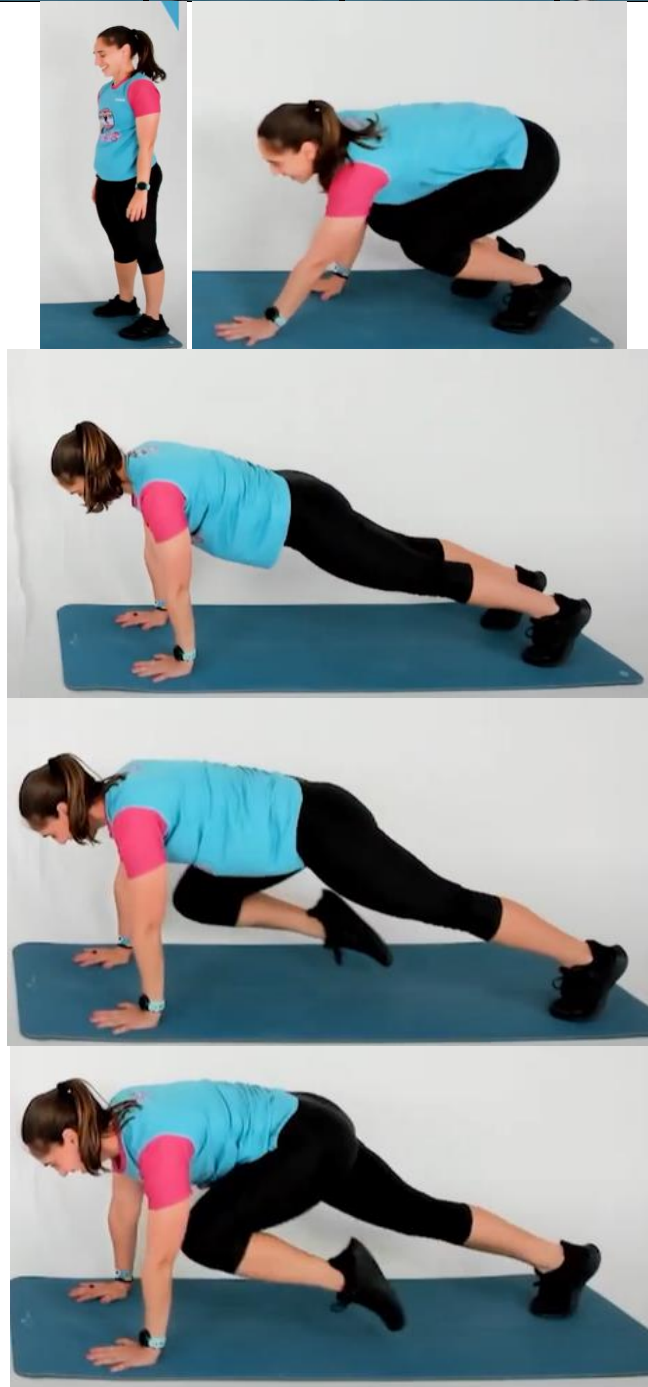

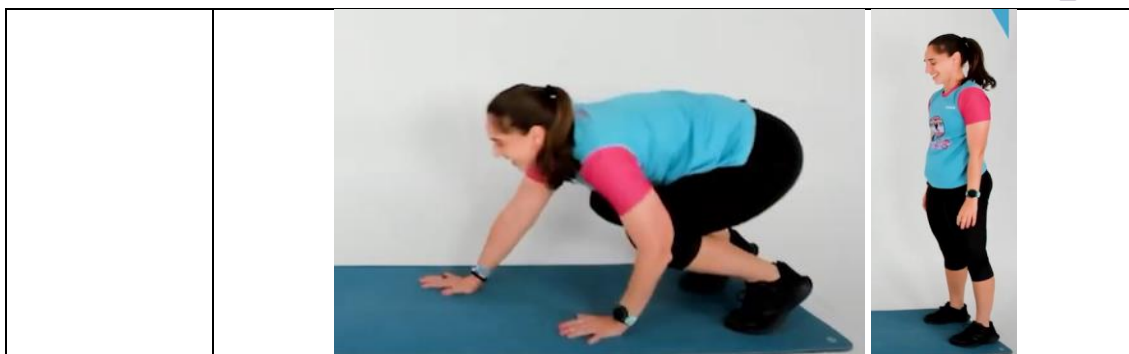

Week 2 - Session 1 ([Link](#))

| Exercise            | Photo |
|---------------------|-------|
| Skater jump         |       |
| Right stride behind |       |



|                                     |                                                                                     |
|-------------------------------------|-------------------------------------------------------------------------------------|
| <p>Alternate tractions</p>          |   |
| <p>Plank tap with diagonal hand</p> |  |



Week 2 - Session 2 ([Link](#))

| Exercise                           | Photo                                                                                |
|------------------------------------|--------------------------------------------------------------------------------------|
| Skater jump with hand down         |    |
| From stride, kick in front         |   |
| Double traccions                   |  |
| Elbow plank tap, diagonal hand tap |  |

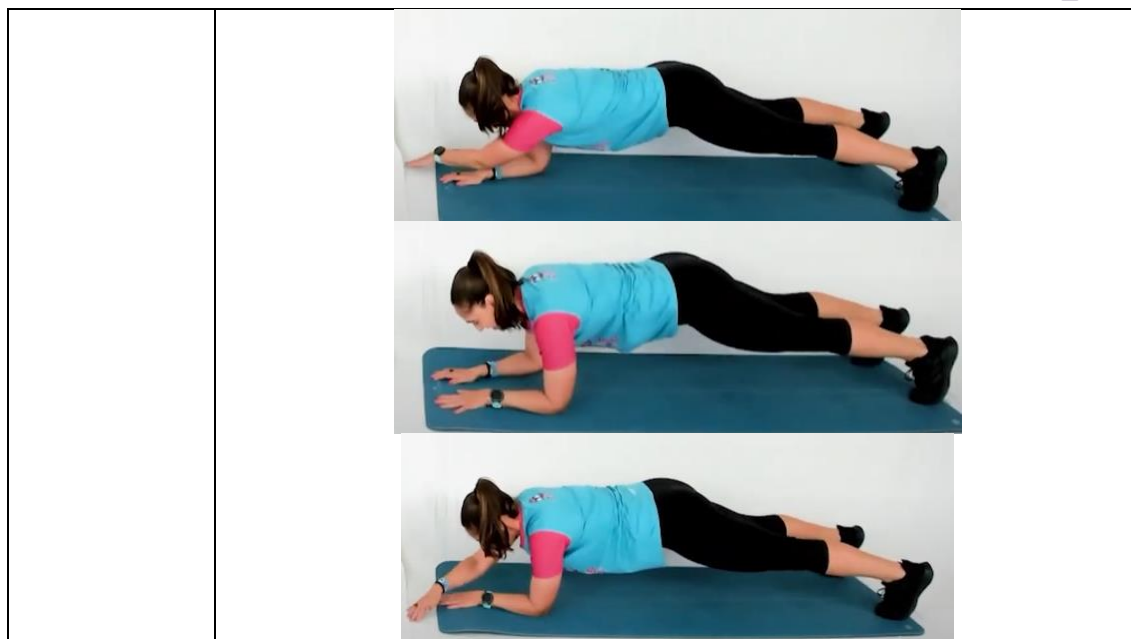

*Week 3 - Session 1 ([Link](#))*

| Exercise                                      | Photo |
|-----------------------------------------------|-------|
| Skipping                                      |       |
| Lunge jump                                    |       |
| Small semicircle of arms with extended elbows |       |



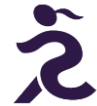

|                                                           |                                                                                    |
|-----------------------------------------------------------|------------------------------------------------------------------------------------|
| <p>From four-leg position, hand touches opposite knee</p> |  |
|-----------------------------------------------------------|------------------------------------------------------------------------------------|

*Week 3 - Session 2* ([Link](#))

| Exercise                                                                           | Photo                                                                                |
|------------------------------------------------------------------------------------|--------------------------------------------------------------------------------------|
| <p>Skipping + Rope movement with the arms</p>                                      |   |
| <p>Lunge jump with hand sliding down to the opposite side</p>                      |  |
| <p>Large semicircle of arms with extended elbows</p>                               |  |
| <p>From four-leg position with leg extended behind, hand touches opposite knee</p> |  |



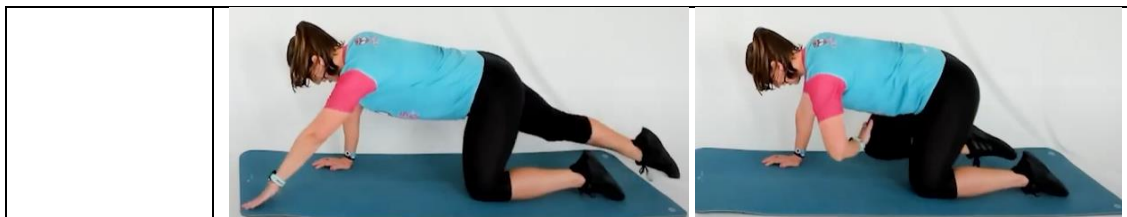

Week 4 - Session 1 ([Link](#))

| Exercise                                 | Photo                                                                                |
|------------------------------------------|--------------------------------------------------------------------------------------|
| Jumping hands on waist                   |    |
| Tiptoe walking                           |   |
| Pumping of arms extended back            |  |
| Knee elevation from four-footed position |  |



Week 4 - Session 2 ([Link](#))

| Exercise                                                         | Photo                                                                                |
|------------------------------------------------------------------|--------------------------------------------------------------------------------------|
| Jumping fists up                                                 |    |
| Flexo-extension of ankles                                        |    |
| 4X pumping of arms extended back + cross arms in front           |   |
| Knee elevation from four-footed position and semi-extension back |  |

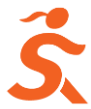

# Month 4 (40" of work - 15" of recovery)

## Common Part

*Dynamic Warm-up (At the beginning of each session before the main part) ([Link](#))*

| Exercise                             | Photograph                                                                           |  |
|--------------------------------------|--------------------------------------------------------------------------------------|--|
| Semicircle rotation of the neck      |    |  |
| Shoulder lift                        |   |  |
| Extension and flexion of fingers     |  |  |
| Cross arms and elbow flexo-extension |  |  |



|                                                              |  |
|--------------------------------------------------------------|--|
| <p>Shoulder rotation with hands on shoulders</p>             |  |
| <p>Leg swinging, knee flexes in front and extends behind</p> |  |
| <p>In balance flexo-extension of the knee</p>                |  |
| <p>3X jump side to side</p>                                  |  |



*Stretching (At the end of each session after the main part) ([Link](#))*

| Stretch                                  | Photograph                                                                           |  |
|------------------------------------------|--------------------------------------------------------------------------------------|--|
| Neck tilt with hand aid                  |    |  |
| Hands behind the neck and cat camel      |    |  |
| Open legs, lateral tilt                  |   |  |
| One leg in front of another. Hip flexion |  |  |
| Low lunge                                |  |  |



|                                                                            |                                                                                     |
|----------------------------------------------------------------------------|-------------------------------------------------------------------------------------|
| <p>Low lunge + twist</p>                                                   |   |
| <p>From sitting position, legs extended and abduction with hip flexion</p> |   |
| <p>Bound angle pose</p>                                                    |  |

Main part (4 rounds of 4 exercises with 1' rest in between rounds) (40'' Work – 15'' Rest)

Week 1 - Session 1 ([Link](#))

| Exercise               | Photo                                                                                |
|------------------------|--------------------------------------------------------------------------------------|
| <p>Jump front-back</p> |  |



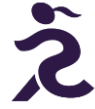

|                                                                 |                                                   |
|-----------------------------------------------------------------|---------------------------------------------------|
| <p>Sumo squat<br/>with<br/>alternating<br/>heel lift</p>        |                                                   |
| <p>From arm<br/>cross position<br/>abduction-<br/>adduction</p> |                                                   |
| <p>Plank touch<br/>opposite<br/>elbow</p>                       | <p style="text-align: center;"><b>Level 1</b></p> |
|                                                                 | <p style="text-align: center;"><b>Level 2</b></p> |



Week 1 - Session 2 ([Link](#))

| Exercise                                           | Photo                                        |
|----------------------------------------------------|----------------------------------------------|
| Sprint in front-sprint behind                      |                                              |
| Sumo squat with heel lift                          |                                              |
| Arms cross + Abduction-adduction crossing in front |                                              |
| Plank touch opposite hip                           | <p data-bbox="842 1339 930 1368">Level 1</p> |
|                                                    | <p data-bbox="842 1798 930 1827">Level 2</p> |

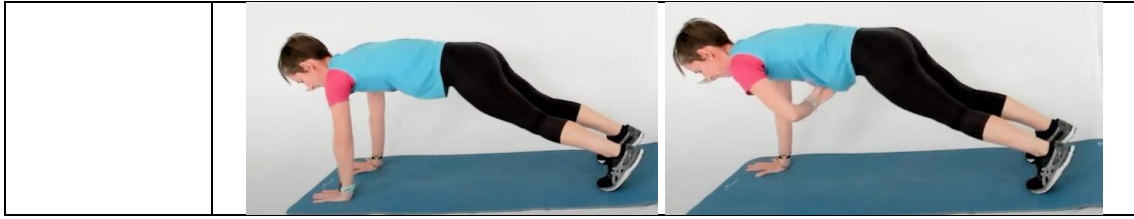

*Week 2 - Session 1 ([Link](#))*

| Exercise                   | Photo                                                                                |
|----------------------------|--------------------------------------------------------------------------------------|
| Cross jumping              | <b>Level 1</b>                                                                       |
|                            |    |
|                            | <b>Level 2</b>                                                                       |
|                            |   |
| Hip rotation with leg lift |  |



|                                                        |  |
|--------------------------------------------------------|--|
| <p>Four-footed and tap in front of alternate hands</p> |  |
|--------------------------------------------------------|--|

**Level 1**

|                                              |  |
|----------------------------------------------|--|
| <p>Elbow plank and ankle flexo-extension</p> |  |
|----------------------------------------------|--|

**Level 2**

|  |
|--|
|  |
|--|



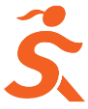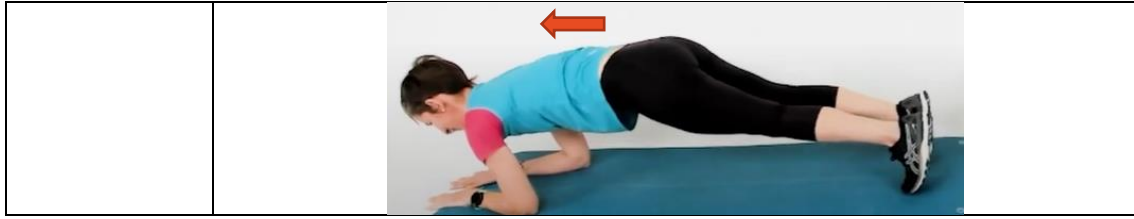

Week 2 - Session 2 ([Link](#))

| Exercise                                       | Photo   |
|------------------------------------------------|---------|
| Cross jumping + cross arms                     | Level 1 |
|                                                |         |
|                                                | Level 2 |
|                                                |         |
| Abduction with skater                          |         |
| Four-footed position and tap in front of hands |         |

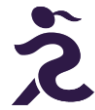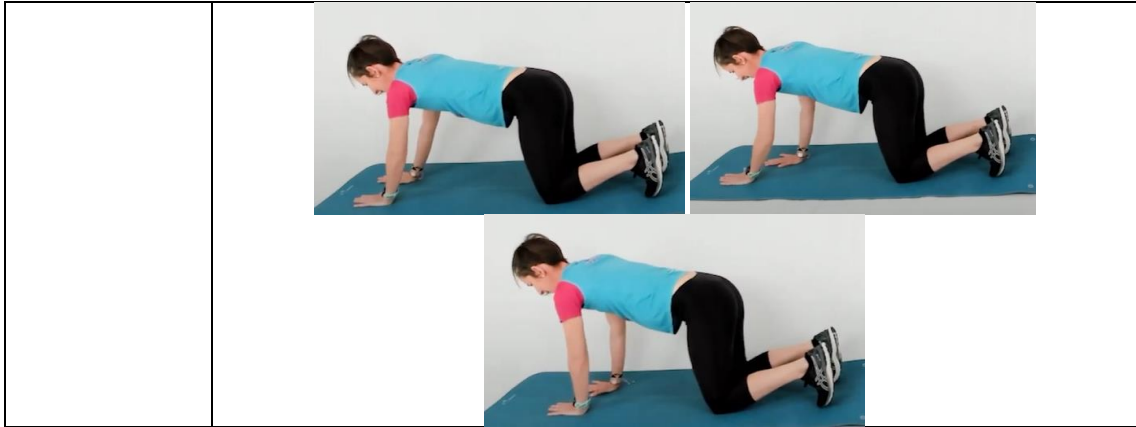

**Level 1**

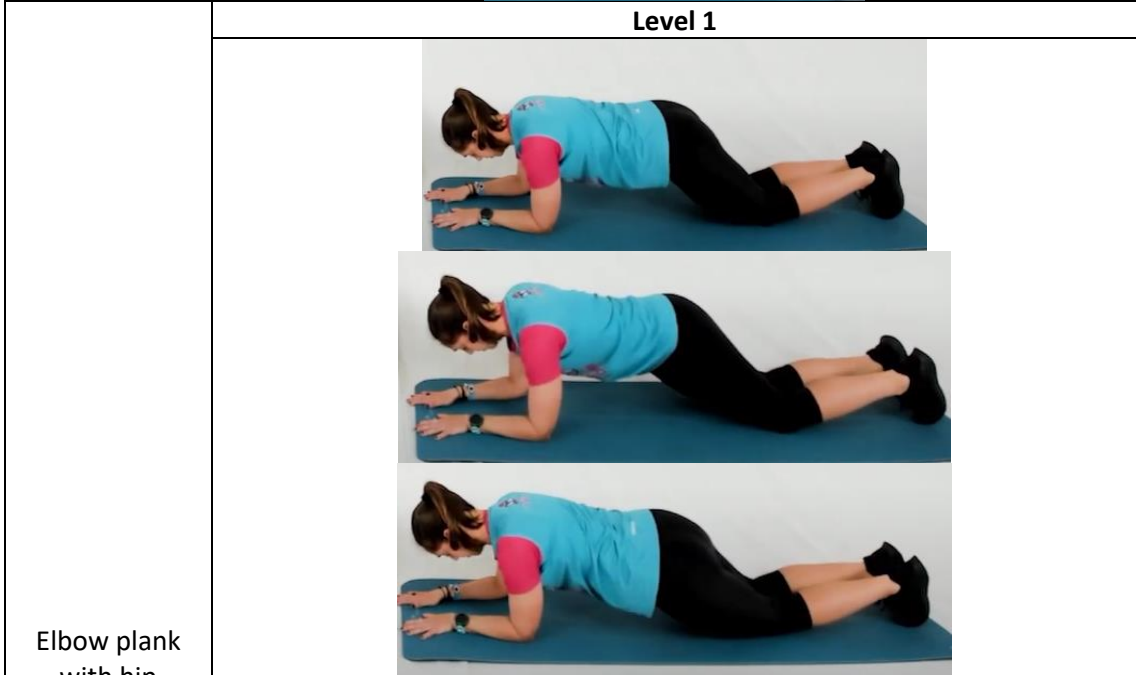

**Level 2**

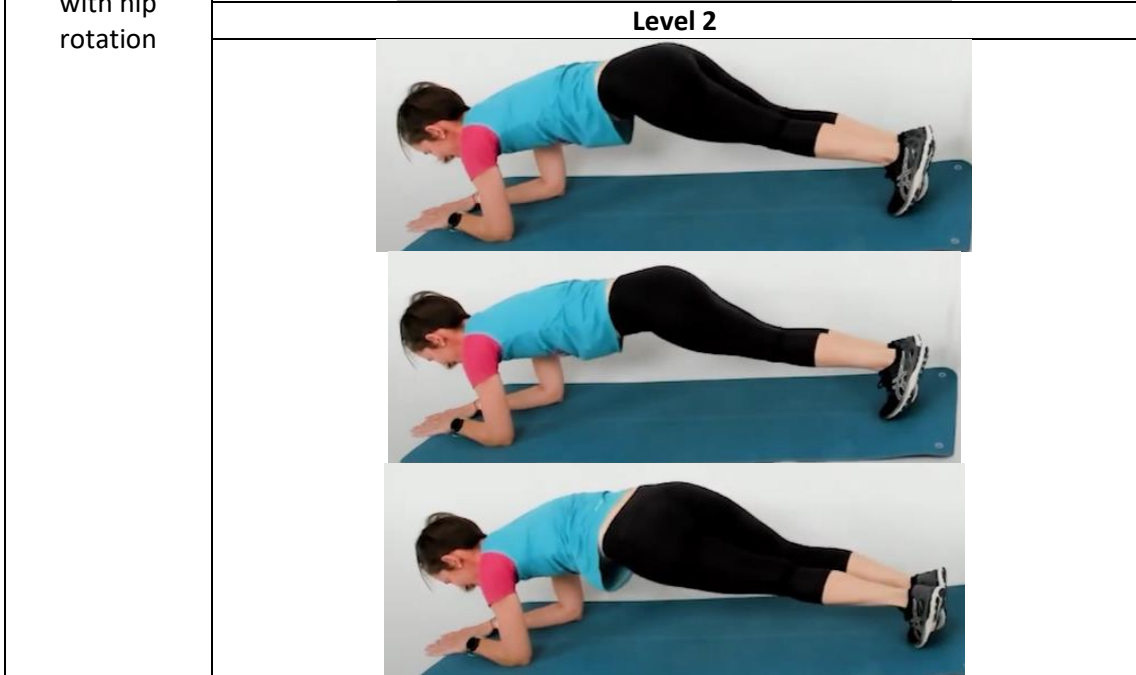





Week 3 - Session 1 ([Link](#))

| Exercise                                | Photo                                                                                                                                  |
|-----------------------------------------|----------------------------------------------------------------------------------------------------------------------------------------|
| Sky side to side                        |                                                      |
| Sumo squat + leg abduction              |                                                     |
| Four-footed position + bending an elbow |                                                    |
| Mountain climber                        | <p style="text-align: center;"><b>Level 1</b></p>  |

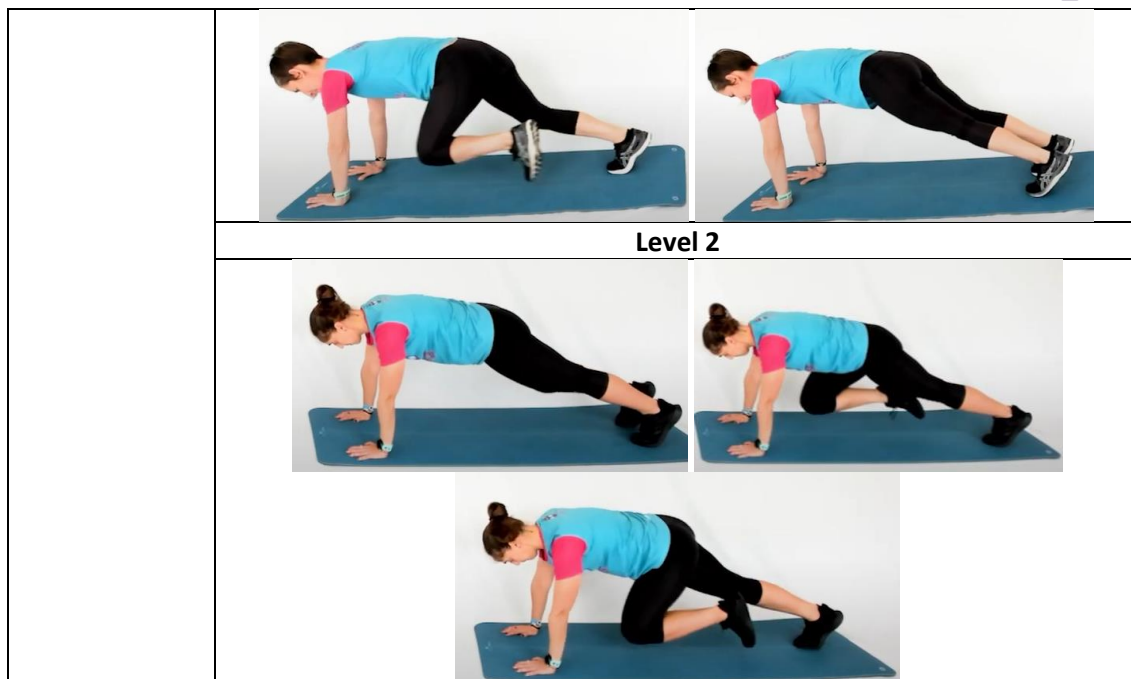



Week 3 - Session 2 ([Link](#))

| Exercise                                       | Photo                                                                                                                                                                |
|------------------------------------------------|----------------------------------------------------------------------------------------------------------------------------------------------------------------------|
| Sky side to side x2                            |                                                                                    |
| Sumo squat + leg abduction + extended arm lift |                                                                                   |
| Four footed leg + bending two elbows           |                                                                                  |
| Cross body mountain climber                    | <p data-bbox="842 1536 927 1570" style="text-align: center;"><b>Level 1</b></p>  |

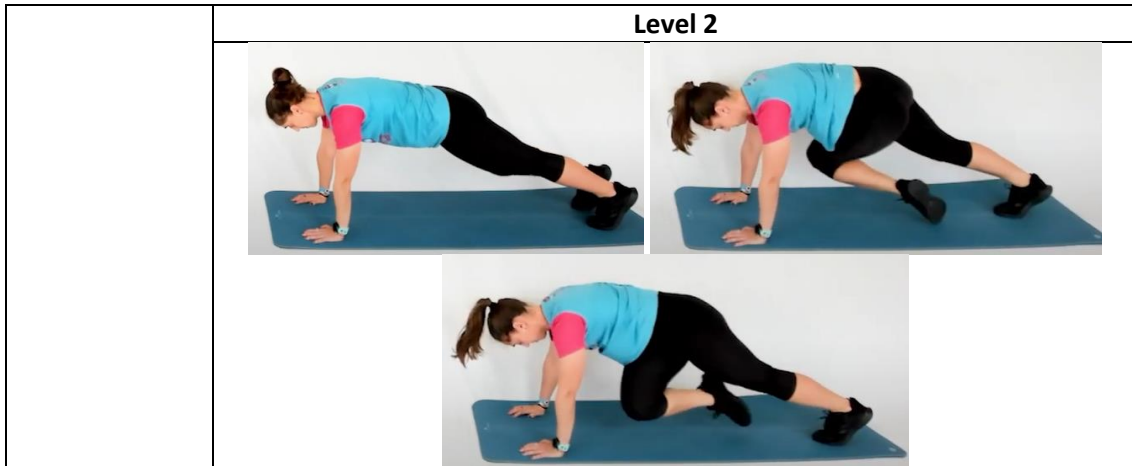

*Week 4 - Session 1 ([Link](#))*

| Exercise           | Photo |
|--------------------|-------|
| Skipping           |       |
| Squat + glute kick |       |



|                                        |                                                                                     |
|----------------------------------------|-------------------------------------------------------------------------------------|
| <p>Cuadруп touch opposite elbow</p>    |   |
| <p>Sit down + torsion side to side</p> |  |

*Week 4 - Session 2* ([Link](#))

| Exercise                                          | Photo                                                                                |
|---------------------------------------------------|--------------------------------------------------------------------------------------|
| <p>Skipping</p>                                   |  |
| <p>Lunge + leg lift back + knee lift in front</p> |  |





|                                                               |  |
|---------------------------------------------------------------|--|
|                                                               |  |
| <p>From four-footed push-up + touch the opposite shoulder</p> |  |
| <p>Sit down: side to side twist with legs up</p>              |  |





# Month 5 (40" of work - 15" of recovery)

## Common Part

*Dynamic Warm-up (At the beginning of each session before the main part) ([Link](#))*

| Exercise                                            | Photograph                                                                           |
|-----------------------------------------------------|--------------------------------------------------------------------------------------|
| Flex-extension<br>+ neck<br>rotation                |    |
| With hands on<br>shoulders,<br>shoulder<br>rotation |   |
| Semisquat +<br>column<br>rotation side<br>to side   |  |
| Hip<br>circunduction                                |  |



|                                 |                                                                                      |
|---------------------------------|--------------------------------------------------------------------------------------|
| Hip rotation                    |    |
| March on site                   |    |
| Lateral movement + lateral kick |   |
| Lateral movement + skater       |  |

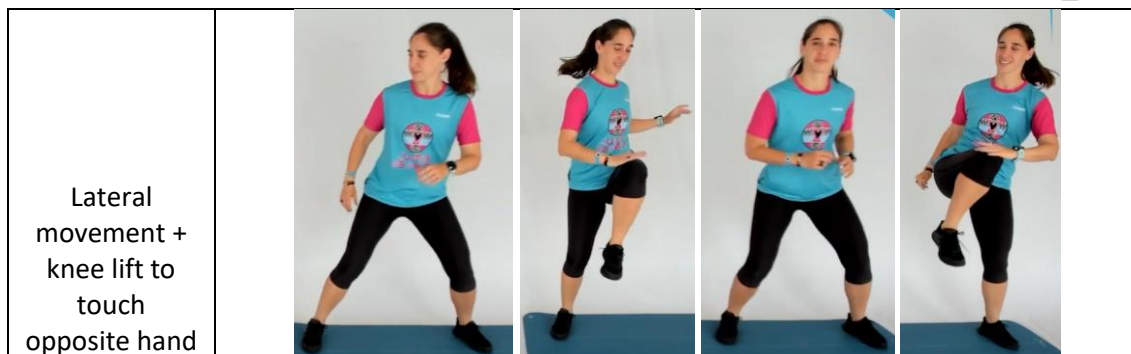

*Stretching (At the end of each session after the main part) ([Link](#))*

| Stretch                                                    | Photograph |
|------------------------------------------------------------|------------|
| <p>Neck lateral assisted stretching</p>                    |            |
| <p>Column torsion sitting in chair</p>                     |            |
| <p>Lateral inclination of the spine + arm extension up</p> |            |



|                                                                                                |  |
|------------------------------------------------------------------------------------------------|--|
| <p>Cat-camel<br/>sitting in a<br/>chair</p>                                                    |  |
| <p>Leg abduction<br/>+ trunk flexion<br/>sitting in chair<br/>+ twisting<br/>with arm lift</p> |  |
| <p>Pyramidal<br/>stretch sitting<br/>in chair</p>                                              |  |
| <p>Posterior<br/>chain stretch<br/>with trunk<br/>flexion front<br/>sitting in chair</p>       |  |



Main part (4 rounds of 4 exercises with 1' rest in between rounds) (40'' Work – 15'' Rest)

Week 1 - Session 1 ([Link](#))

| Exercise                                                 | Photo                                                                                |
|----------------------------------------------------------|--------------------------------------------------------------------------------------|
| Sprint + Sumo squat                                      |    |
| Prisoner squat + lateral jump                            |   |
| Arm rotation with hands in front                         |  |
| Four-footed position + Knee lift + side to side movement |  |





Week 1 - Session 2 ([Link](#))

| Exercise                                                              | Photo |
|-----------------------------------------------------------------------|-------|
| Sprint + skipping                                                     |       |
| 2x prisoner squat + lateral jump                                      |       |
| Rotation + arms raise with hands in front                             |       |
| Four-footed position + knee lift + side to side + downward facing dog |       |





Week 2 - Session 1 ([Link](#))

| Exercise                                       | Photo                                                                                |
|------------------------------------------------|--------------------------------------------------------------------------------------|
| Jumping + touch opposite foot                  |    |
| Jump squat + beat both arms down center        |   |
| Push up in four-footed position + side to side |  |
| Lateral plank up and down + arm                |  |



Week 2 - Session 2 ([Link](#))

| Exercise                                          | Photo                                                                                |
|---------------------------------------------------|--------------------------------------------------------------------------------------|
| Jumping + Diagonal arm elevation                  |    |
| Jump squad + beat both arms down side to side     |    |
| Push up X2 in four-footed position + side to side |   |
| Lateral plank + arm cross                         |  |



Week 3 - Session 1 ([Link](#))

| Exercise                                                        | Photo                                                                                                                             |
|-----------------------------------------------------------------|-----------------------------------------------------------------------------------------------------------------------------------|
| 3X jump + 1 jumping close and open legs                         |                                                 |
| Side squat + touch opposite knee                                |                                                 |
| Opening of arms with trunk flexion in front                     | <p data-bbox="842 981 928 1008">Level 1</p>   |
|                                                                 | <p data-bbox="842 1361 928 1388">Level 2</p>  |
| Plank + downguard facing dog touching the opposite foot to foot |                                               |

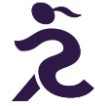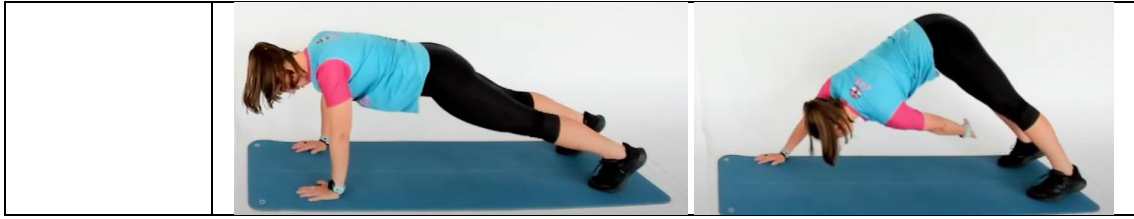

Week 3 - Session 2 ([Link](#))

| Exercise                                          | Photo                                                                                |
|---------------------------------------------------|--------------------------------------------------------------------------------------|
| 3x jumps + 3 jumps with knees up                  | <b>Level 1</b>                                                                       |
|                                                   |    |
|                                                   | <b>Level 2</b>                                                                       |
|                                                   |   |
| Side squat + Touching opposite knee + foot closes |  |



|                                                                     |                                                                                                                                        |
|---------------------------------------------------------------------|----------------------------------------------------------------------------------------------------------------------------------------|
| <p>Arm opening + front lifting of arms with front trunk flexion</p> | <p style="text-align: center;"><b>Level 1</b></p>    |
|                                                                     | <p style="text-align: center;"><b>Level 2</b></p>   |
|                                                                     | <p style="text-align: center;"><b>Level 1</b></p>  |





Plank touching  
opposite  
shoulder +  
downguard  
facing dog  
touching  
opposite hand  
to foot

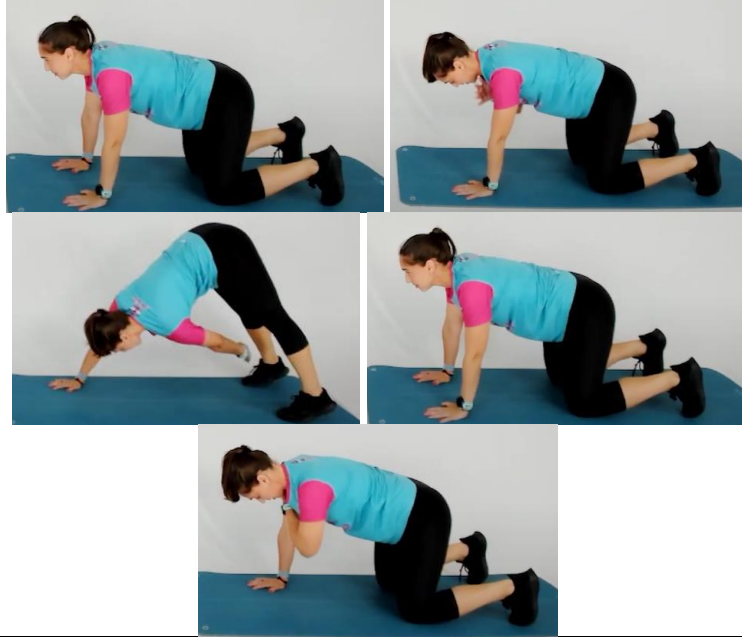

**Level 2**

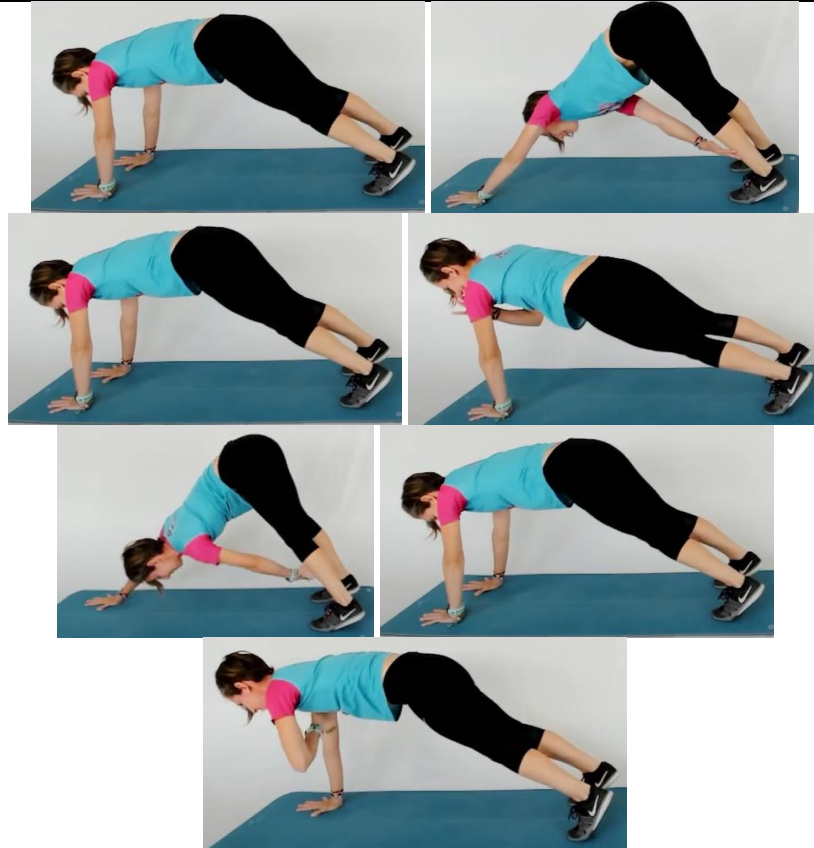





Week 4 - Session 1 ([Link](#))

| Exercise        | Photo                                                                                                                             |
|-----------------|-----------------------------------------------------------------------------------------------------------------------------------|
| Kicks with jump | <p data-bbox="842 275 927 309">Level 1</p>      |
|                 | <p data-bbox="842 660 927 694">Level 2</p>     |
| Prisoner squat  |                                               |
| Hook punch      | <p data-bbox="842 1391 927 1424">Level 1</p>  |
|                 | <p data-bbox="842 1776 927 1809">Level 2</p>                                                                                      |



|                                               |                |
|-----------------------------------------------|----------------|
|                                               |                |
|                                               | <b>Level 1</b> |
| Side to side push arms with intertwined hands |                |
|                                               | <b>Level 2</b> |
|                                               |                |

*Week 4 - Session 2 ([Link](#))*

| Exercise                 | Photo          |
|--------------------------|----------------|
| Kicks + arm extension up | <b>Level 1</b> |
|                          |                |
|                          | <b>Level 2</b> |

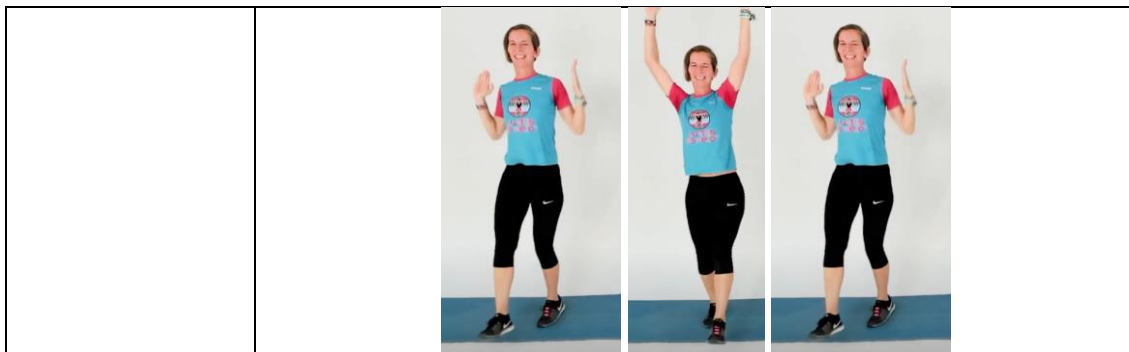

Level 1

Prisoner squat to side

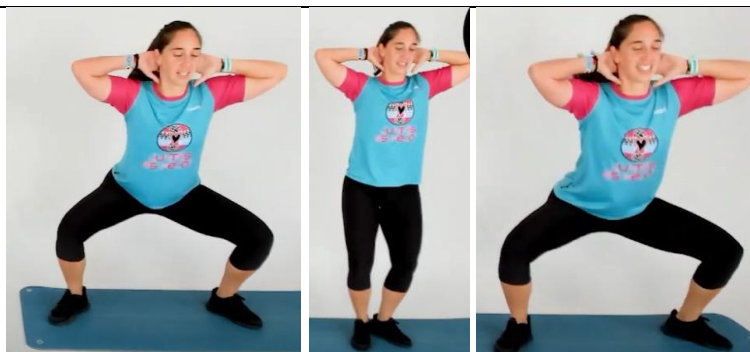

Level 2

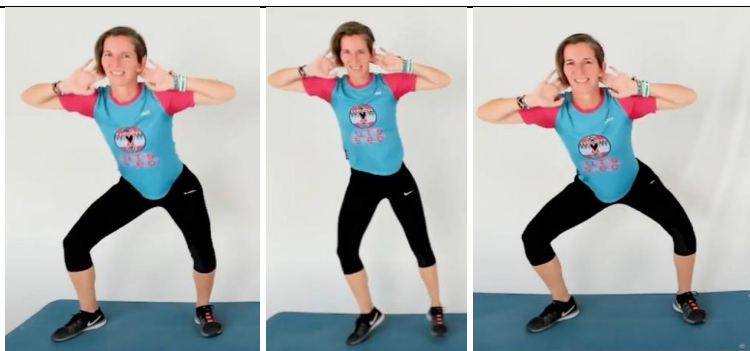

Level 1

Hook and punch

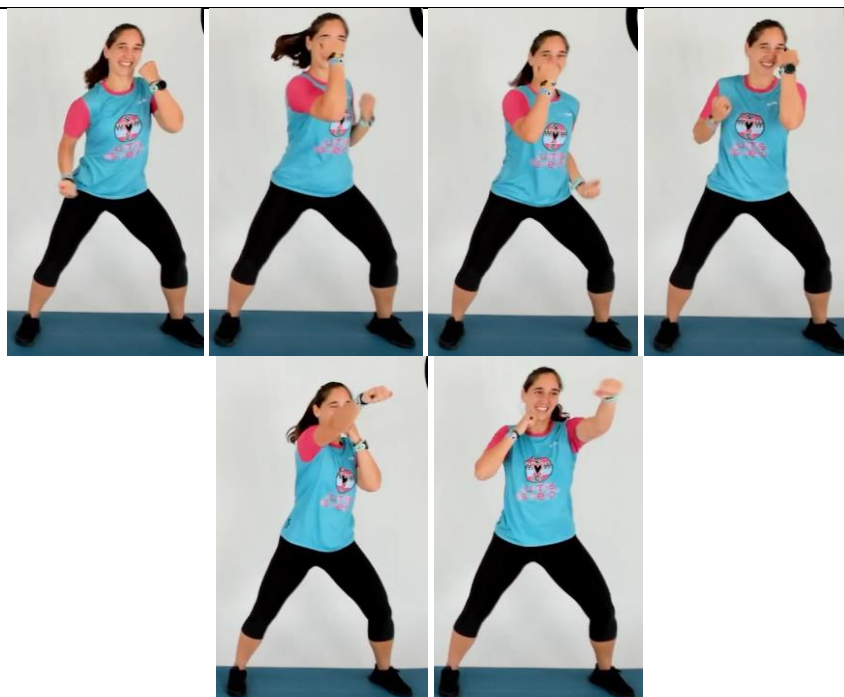



|                                                                                |                                                                                                                                        |
|--------------------------------------------------------------------------------|----------------------------------------------------------------------------------------------------------------------------------------|
|                                                                                | <p style="text-align: center;"><b>Level 2</b></p> 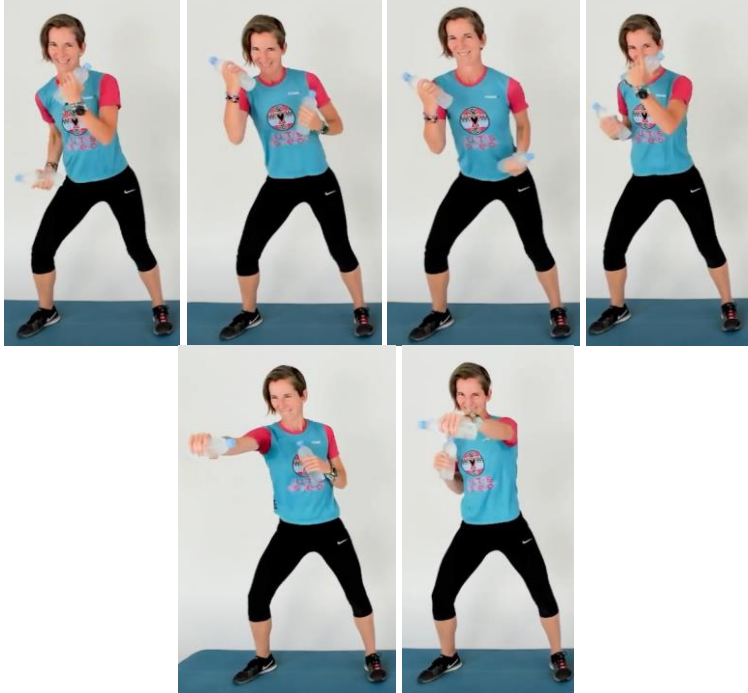   |
| Side to side arms<br>push with<br>intertwined hands<br>and lateral<br>movement | <p style="text-align: center;"><b>Level 1</b></p>   |
|                                                                                | <p style="text-align: center;"><b>Level 2</b></p>  |



# Month 6 (40" of work - 15" of recovery)

## Common Part

*Dynamic Warm-up (At the beginning of each session before the main part) ([Link](#))*

| Exercise                                                        | Photograph                                                                                                                                                                                                                                                                                                                                                                                                                                                                                                                                            |
|-----------------------------------------------------------------|-------------------------------------------------------------------------------------------------------------------------------------------------------------------------------------------------------------------------------------------------------------------------------------------------------------------------------------------------------------------------------------------------------------------------------------------------------------------------------------------------------------------------------------------------------|
| Neck flexion and extension, neck torsion                        |  Four photographs of a woman in a blue and pink shirt and black leggings performing neck exercises. From left to right: 1. Neck flexion (head tilted back), 2. Neck extension (head tilted forward), 3. Neck torsion to the right (head turned right), 4. Neck torsion to the left (head turned left).                                                                                                                                                              |
| Hands to opposite elbows above the head and lateral column tilt |  Two photographs of a woman in a blue and pink shirt and black leggings performing lateral column tilt exercises. In both, her hands are raised above her head and she is leaning to the side. The first photo shows her leaning to her right, and the second shows her leaning to her left.                                                                                                                                                                       |
| Arms balance, down and side                                     |  Six photographs of a woman in a blue and pink shirt and black leggings performing arms balance exercises. The top row shows four photos: 1. Arms raised straight up, 2. Arms bent at the elbows with forearms parallel to the ground, 3. Arms raised straight up, 4. Arms bent at the elbows with forearms parallel to the ground. The bottom row shows two photos: 5. Arms raised straight up, 6. Arms bent at the elbows with forearms parallel to the ground. |





|                                                        |  |
|--------------------------------------------------------|--|
| <p>One leg extension in front with arms down</p>       |  |
| <p>Hip rotation</p>                                    |  |
| <p>Lateral movement + arms extension up and down</p>   |  |
| <p>Sprint + open and close legs + up and down arms</p> |  |





Stretching (At the end of each session after the main part) ([Link](#))

| Stretch                                       | Photograph                                                                           |
|-----------------------------------------------|--------------------------------------------------------------------------------------|
| Supine position: arm extension                |    |
| Hand to opposite knee and column rotation     |   |
| Cross one leg and catch down leg to the chest |  |



|                                                                                               |                                                                                    |
|-----------------------------------------------------------------------------------------------|------------------------------------------------------------------------------------|
| <p>2 legs flexion to the chest catching with hands + 2 legs extension with arms extension</p> |  |
|-----------------------------------------------------------------------------------------------|------------------------------------------------------------------------------------|

Main part (4 rounds of 4 exercises with 1' rest in between rounds) (40'' Work – 15'' Rest)

Week 1 - Session 1 ([Link](#))

| Exercise                 | Photo                                                                               |                                                                                     |                                                                                      |
|--------------------------|-------------------------------------------------------------------------------------|-------------------------------------------------------------------------------------|--------------------------------------------------------------------------------------|
| Jump rope with foot taps | <b>Level 1</b>                                                                      |                                                                                     |                                                                                      |
|                          |   |   |   |
|                          | <b>Level 2</b>                                                                      |                                                                                     |                                                                                      |
|                          |  |  |  |



|                                                                            |                |  |  |  |
|----------------------------------------------------------------------------|----------------|--|--|--|
|                                                                            | <b>Level 1</b> |  |  |  |
|                                                                            |                |  |  |  |
| Toe touch<br>with opposite<br>hand and knee<br>touch with<br>opposite hand | <b>Level 2</b> |  |  |  |
|                                                                            |                |  |  |  |
|                                                                            |                |  |  |  |



|                                                           |                |  |
|-----------------------------------------------------------|----------------|--|
| Arm rotation in abduction and other arm in straight angle | <b>Level 1</b> |  |
|                                                           |                |  |
|                                                           | <b>Level 2</b> |  |
|                                                           |                |  |
| Sit down and punch                                        | <b>Level 1</b> |  |
|                                                           |                |  |
|                                                           | <b>Level 2</b> |  |
|                                                           |                |  |

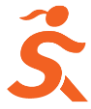

Week 1 - Session 2 (Link)

| Exercise                                      | Photo                                                                                |
|-----------------------------------------------|--------------------------------------------------------------------------------------|
| Jump rope with tap and crossing arms          | <b>Level 1</b>                                                                       |
|                                               | 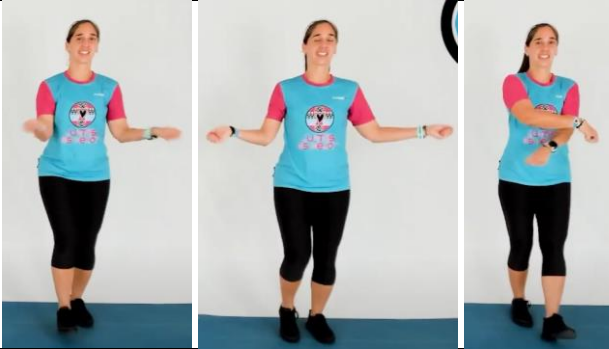   |
|                                               | <b>Level 2</b>                                                                       |
|                                               |   |
| Toe touch with opposite hand and lateral kick | <b>Level 1</b>                                                                       |
|                                               |  |



Level 2

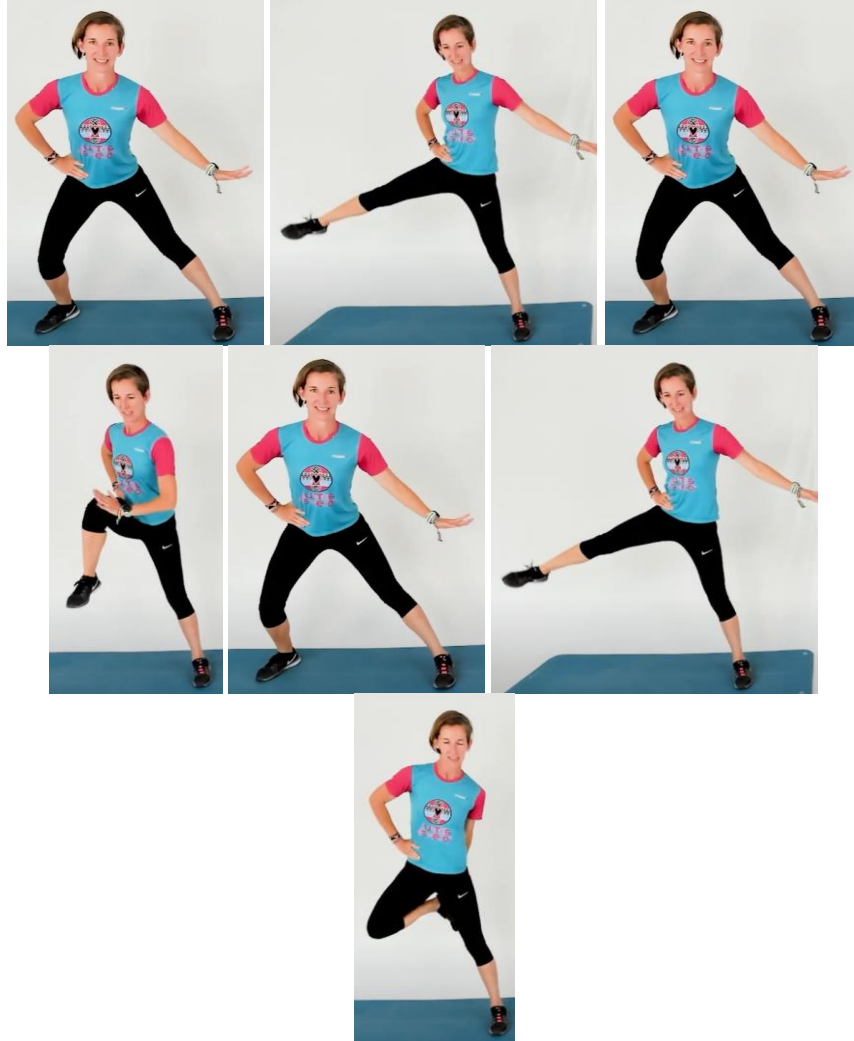

Level 1

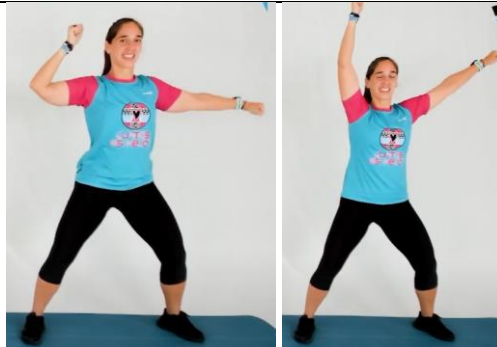

Level 2

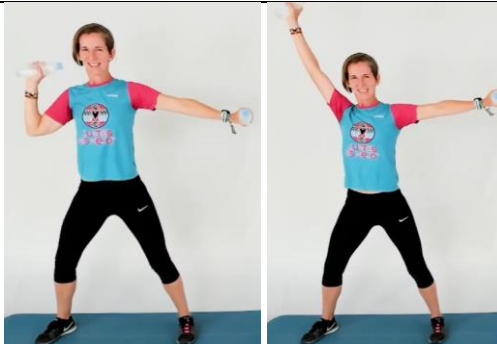

Arm rotation  
in abduction  
and other arm  
in straight  
angle to up  
extension





|                                                          |                                                                                    |
|----------------------------------------------------------|------------------------------------------------------------------------------------|
|                                                          |                                                                                    |
| Sit down and punch with feet without touching the ground | <b>Level 1</b>                                                                     |
|                                                          |  |
|                                                          | <b>Level 2</b>                                                                     |
|                                                          |  |

*Week 2 - Session 1 ([Link](#))*

| Exercise                      | Photo                                                                                |
|-------------------------------|--------------------------------------------------------------------------------------|
| Back tap in half squat + jump | <b>Level 1</b>                                                                       |
|                               |   |
|                               | <b>Level 2</b>                                                                       |
|                               |  |
|                               |  |
|                               |  |



|                                               |                                                                                                                                                                           |
|-----------------------------------------------|---------------------------------------------------------------------------------------------------------------------------------------------------------------------------|
|                                               | <p style="text-align: center;"><b>Level 1</b></p>  <p>Lunge + squat<br/>jump + jump</p> |
|                                               | <p style="text-align: center;"><b>Level 2</b></p>                                      |
| <p>Arm rotation<br/>in straight<br/>angle</p> | <p style="text-align: center;"><b>Level 1</b></p>                                     |



|                                                      |                                                                                                                                        |
|------------------------------------------------------|----------------------------------------------------------------------------------------------------------------------------------------|
|                                                      | <p style="text-align: center;"><b>Level 2</b></p>    |
| <p>Plank + 2<br/>small steps +<br/>hip elevation</p> | <p style="text-align: center;"><b>Level 1</b></p>   |
|                                                      | <p style="text-align: center;"><b>Level 2</b></p>  |



Week 2 - Session 2 ([Link](#))

| Exercise                   | Photo                                                                                                                             |
|----------------------------|-----------------------------------------------------------------------------------------------------------------------------------|
| Lunge jump +<br>squat jump | <p data-bbox="842 277 927 309">Level 1</p>     |
|                            | <p data-bbox="842 1010 927 1041">Level 2</p>  |



|                                                                    |                                                                                                                                        |
|--------------------------------------------------------------------|----------------------------------------------------------------------------------------------------------------------------------------|
| <p>2 lunge jumps<br/>+ 2 squat<br/>jumps</p>                       | <p style="text-align: center;"><b>Level 1</b></p>    |
|                                                                    | <p style="text-align: center;"><b>Level 2</b></p>   |
| <p>Arm rotation<br/>in straight<br/>angle and up<br/>extension</p> | <p style="text-align: center;"><b>Level 1</b></p>  |





|                                                   |                                                                                                                                        |
|---------------------------------------------------|----------------------------------------------------------------------------------------------------------------------------------------|
|                                                   | <p style="text-align: center;"><b>Level 2</b></p>    |
| <p>Mountain climber + 2 steps + hip elevation</p> | <p style="text-align: center;"><b>Level 1</b></p>   |
|                                                   | <p style="text-align: center;"><b>Level 2</b></p>  |



Week 3 - Session 1 ([Link](#))

| Exercise                                                                 | Photo                                                                                |
|--------------------------------------------------------------------------|--------------------------------------------------------------------------------------|
| <p>Sumo squat<br/>jump and<br/>knee elevation<br/>to elbow<br/>touch</p> | <p>Level 1</p>                                                                       |
|                                                                          |    |
|                                                                          | <p>Level 2</p>                                                                       |
|                                                                          |   |
| <p>Lateral lunge,<br/>step touching<br/>opposite toe</p>                 | <p>Level 1</p>                                                                       |
|                                                                          |  |



|                                           |                                                   |
|-------------------------------------------|---------------------------------------------------|
|                                           | <p style="text-align: center;"><b>Level 2</b></p> |
| Supine position: arms opening and closing | <p style="text-align: center;"><b>Level 1</b></p> |
|                                           | <p style="text-align: center;"><b>Level 2</b></p> |
|                                           | <p style="text-align: center;"><b>Level 1</b></p> |
|                                           | <p style="text-align: center;"><b>Level 2</b></p> |



Week 3 - Session 2 ([Link](#))

| Exercise                                                           | Photo                                                                                                                             |
|--------------------------------------------------------------------|-----------------------------------------------------------------------------------------------------------------------------------|
| Sumo squat<br>jump side and<br>knee elevation<br>to touch<br>elbow | <p data-bbox="842 286 927 309">Level 1</p>     |
|                                                                    | <p data-bbox="842 1016 927 1039">Level 2</p>  |



|                                                                                                       |                                                                                                                                                                                                                         |
|-------------------------------------------------------------------------------------------------------|-------------------------------------------------------------------------------------------------------------------------------------------------------------------------------------------------------------------------|
| <p>Lateral lunge<br/>step touching<br/>opposite toe<br/>+ knee<br/>elevation to<br/>opposite hand</p> | <p style="text-align: center;"><b>Level 1</b></p>   |
|                                                                                                       | <p style="text-align: center;"><b>Level 2</b></p>                                                                                    |
| <p>Supine<br/>position: arms<br/>opening and<br/>closing +<br/>extension</p>                          | <p style="text-align: center;"><b>Level 1</b></p>                                                                                   |



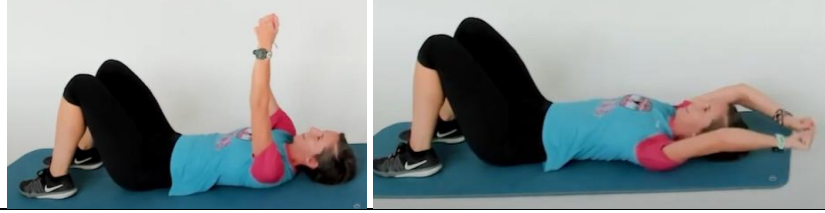

Level 2

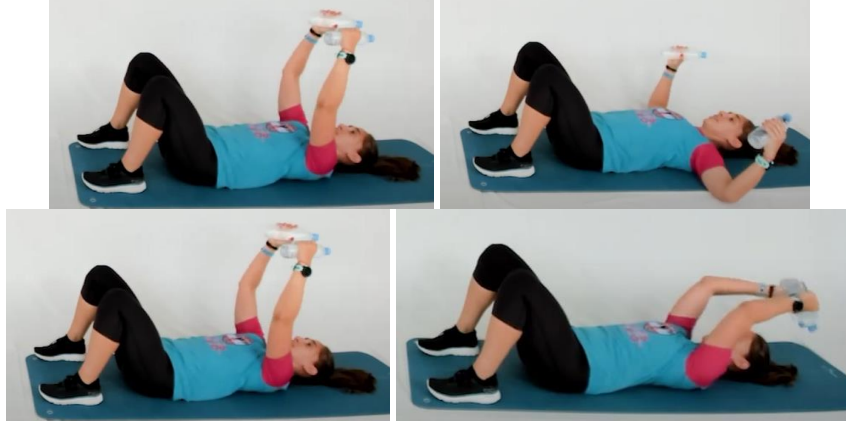

Level 1

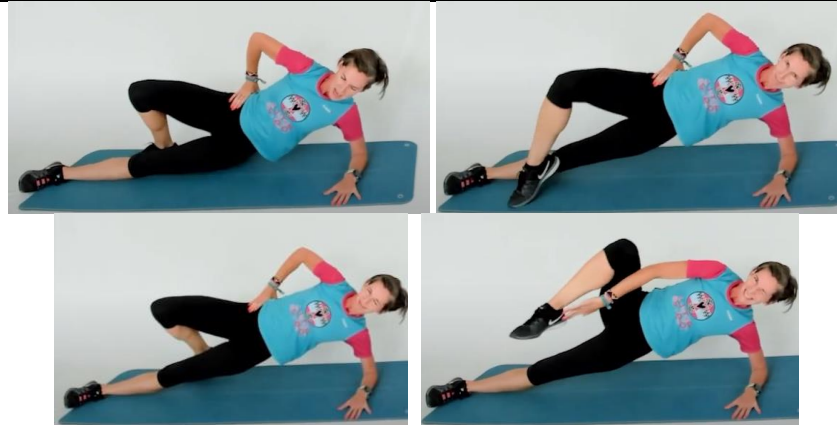

Level 2

Lateral plank +  
one leg touch  
front and back  
and toe touch  
with hand

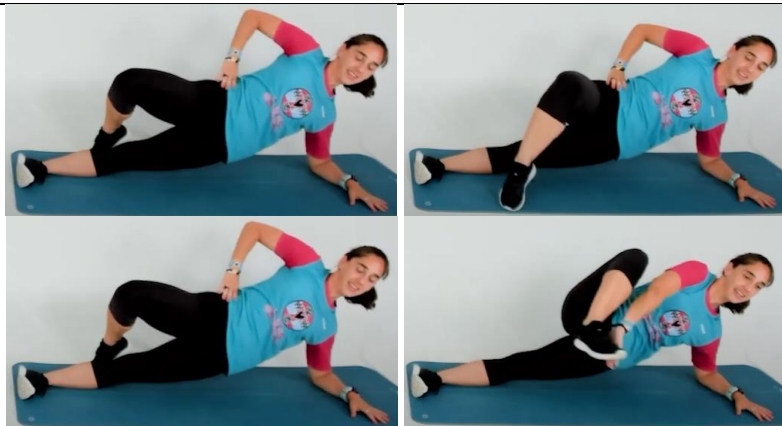



Week 4 - Session 1 ([Link](#))

| Exercise                         | Photo                                                                                                                             |
|----------------------------------|-----------------------------------------------------------------------------------------------------------------------------------|
| Lateral movement + knee crossing | <p data-bbox="842 241 927 273">Level 1</p>      |
|                                  | <p data-bbox="842 667 927 698">Level 2</p>     |
| Squat + kick                     | <p data-bbox="842 1052 927 1084">Level 1</p>  |
|                                  | <p data-bbox="842 1545 927 1576">Level 2</p>  |



|                                         |                                                                                     |                                                                                      |
|-----------------------------------------|-------------------------------------------------------------------------------------|--------------------------------------------------------------------------------------|
| Arm extension up and column inclination | <b>Level 1</b>                                                                      |                                                                                      |
|                                         |    |    |
|                                         | <b>Level 2</b>                                                                      |                                                                                      |
|                                         |    |    |
| Sit down and hip elevation              | <b>Level 1</b>                                                                      |                                                                                      |
|                                         |  |  |
|                                         | <b>Level 2</b>                                                                      |                                                                                      |
|                                         |  |  |

*Week 4 - Session 2 (Link)*

| Exercise                                            | Photo                                                                                                                                                                    |
|-----------------------------------------------------|--------------------------------------------------------------------------------------------------------------------------------------------------------------------------|
| Lateral movement + knee crossing and arms extension | <b>Level 1</b>                                                                                                                                                           |
|                                                     |   |



|                       |                                                                                                                                       |
|-----------------------|---------------------------------------------------------------------------------------------------------------------------------------|
|                       | <p style="text-align: center;"><b>Level 2</b></p>   |
|                       | <p style="text-align: center;"><b>Level 1</b></p>   |
| Squat + kick + sprint | <p style="text-align: center;"><b>Level 2</b></p>  |
|                       |                                                    |



|                                                                       |                                                                                                                                        |
|-----------------------------------------------------------------------|----------------------------------------------------------------------------------------------------------------------------------------|
| <p>Arm extension up and column inclination + circle with the arms</p> | <p style="text-align: center;"><b>Level 1</b></p>    |
|                                                                       | <p style="text-align: center;"><b>Level 2</b></p>    |
| <p>Sit down and hip elevation + one leg extension</p>                 | <p style="text-align: center;"><b>Level 1</b></p>  |
|                                                                       | <p style="text-align: center;"><b>Level 2</b></p>  |





Week 5 - Session 1 ([Link](#))

| Exercise                 | Photo                                                                                                                             |
|--------------------------|-----------------------------------------------------------------------------------------------------------------------------------|
| Punch + squat<br>+ twist | <p data-bbox="842 275 927 309">Level 1</p>      |
|                          | <p data-bbox="842 689 927 723">Level 2</p>     |
| Lateral kick             | <p data-bbox="842 1043 927 1077">Level 1</p>  |
|                          | <p data-bbox="842 1435 927 1469">Level 2</p>  |



|                                                                                                                   |                                                                                                                                        |
|-------------------------------------------------------------------------------------------------------------------|----------------------------------------------------------------------------------------------------------------------------------------|
| <p>Front step<br/>hands to plank<br/>+ mountain<br/>climbing or<br/>front jump +<br/>back step with<br/>hands</p> | <p style="text-align: center;"><b>Level 1</b></p>   |
|                                                                                                                   | <p style="text-align: center;"><b>Level 2</b></p>  |
| <p>Balasana to<br/>plank kneeling<br/>or not<br/>kneeling</p>                                                     | <p style="text-align: center;"><b>Level 1</b></p>  |

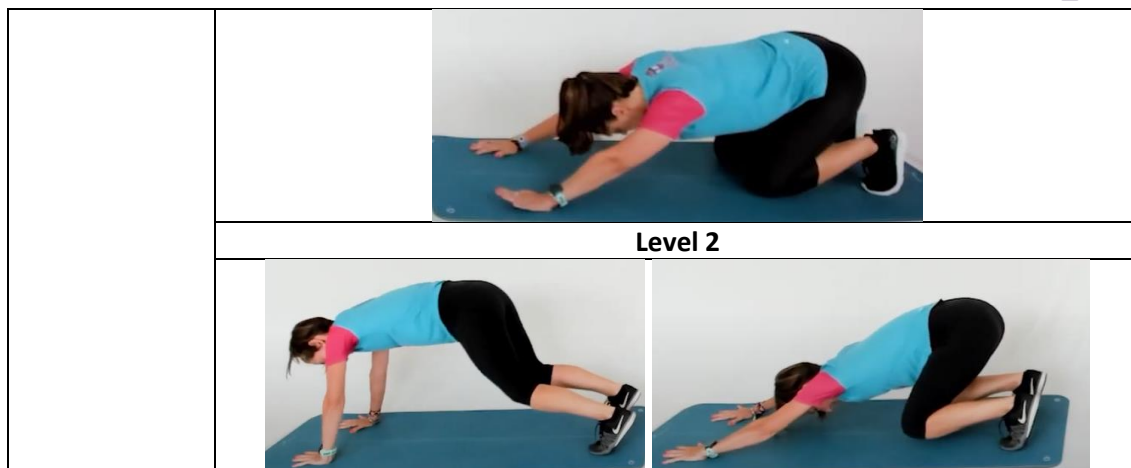

*Week 5 - Session 2 (Link)*

| Exercise                              | Photo                                             |
|---------------------------------------|---------------------------------------------------|
| Punch + squat<br>+ twist x4           | <p style="text-align: center;"><b>Level 1</b></p> |
|                                       | <p style="text-align: center;"><b>Level 2</b></p> |
| Lateral kick +<br>arm extension<br>up | <p style="text-align: center;"><b>Level 1</b></p> |
|                                       | <p style="text-align: center;"><b>Level 2</b></p> |

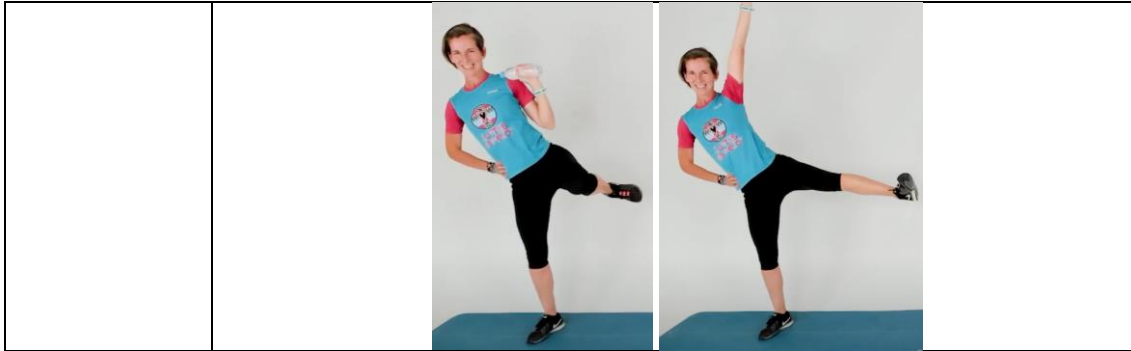

**Level 1**

Front step  
hands to plank  
+ mountain  
climbing or  
front jump +  
touch  
opposite  
shoulder +  
back step  
hands

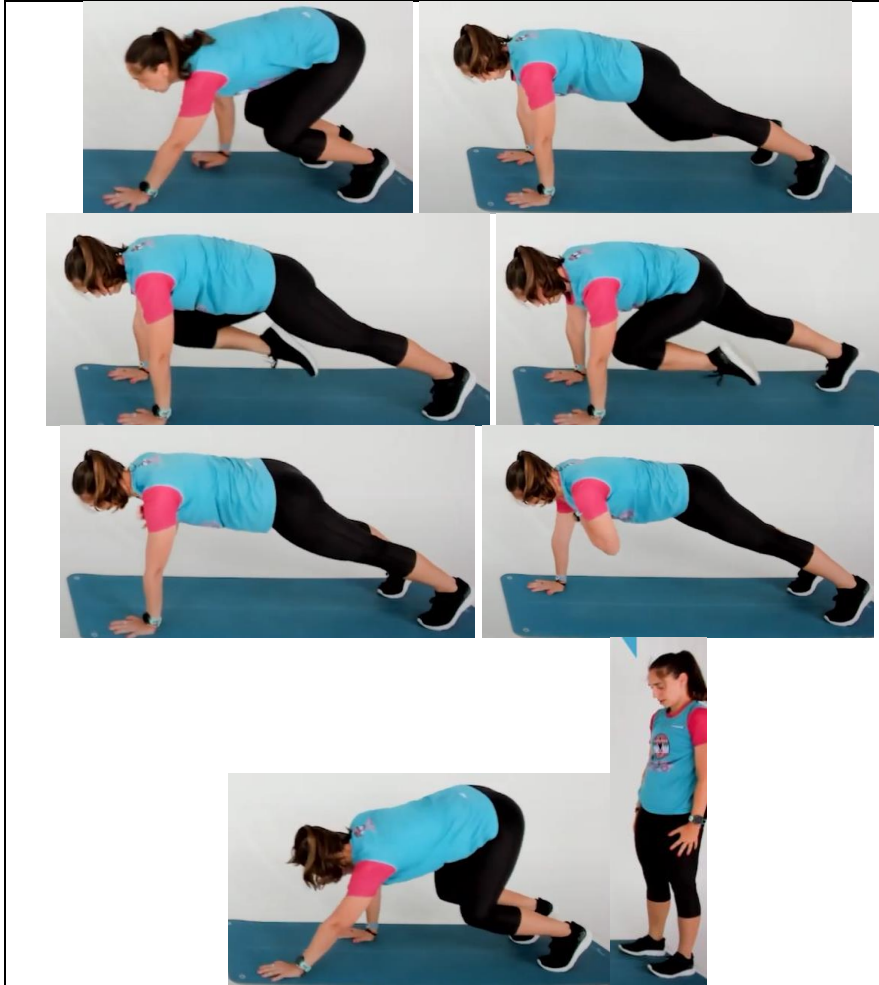

**Level 2**

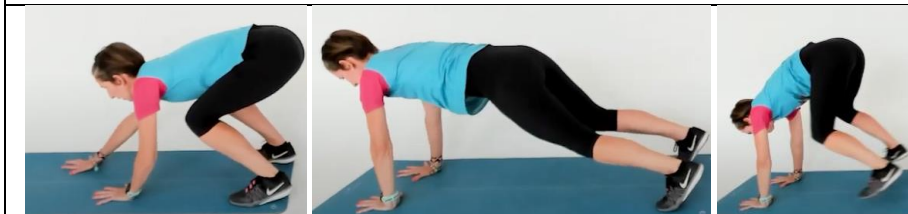





|                                                                                          |                                                   |
|------------------------------------------------------------------------------------------|---------------------------------------------------|
|                                                                                          |                                                   |
| <p>Balasana to<br/>plank kneeling<br/>or not<br/>kneeling +<br/>mountain<br/>climber</p> | <p style="text-align: center;"><b>Level 1</b></p> |
|                                                                                          | <p style="text-align: center;"><b>Level 2</b></p> |
